# Supplementary material for: Highly flexible infection programs in a specialized wheat pathogen
Source: PubMed Central journal article supplement (PMC6342133; doi:10.1002/ece3.4724), 2018-12-26

**Figure S1**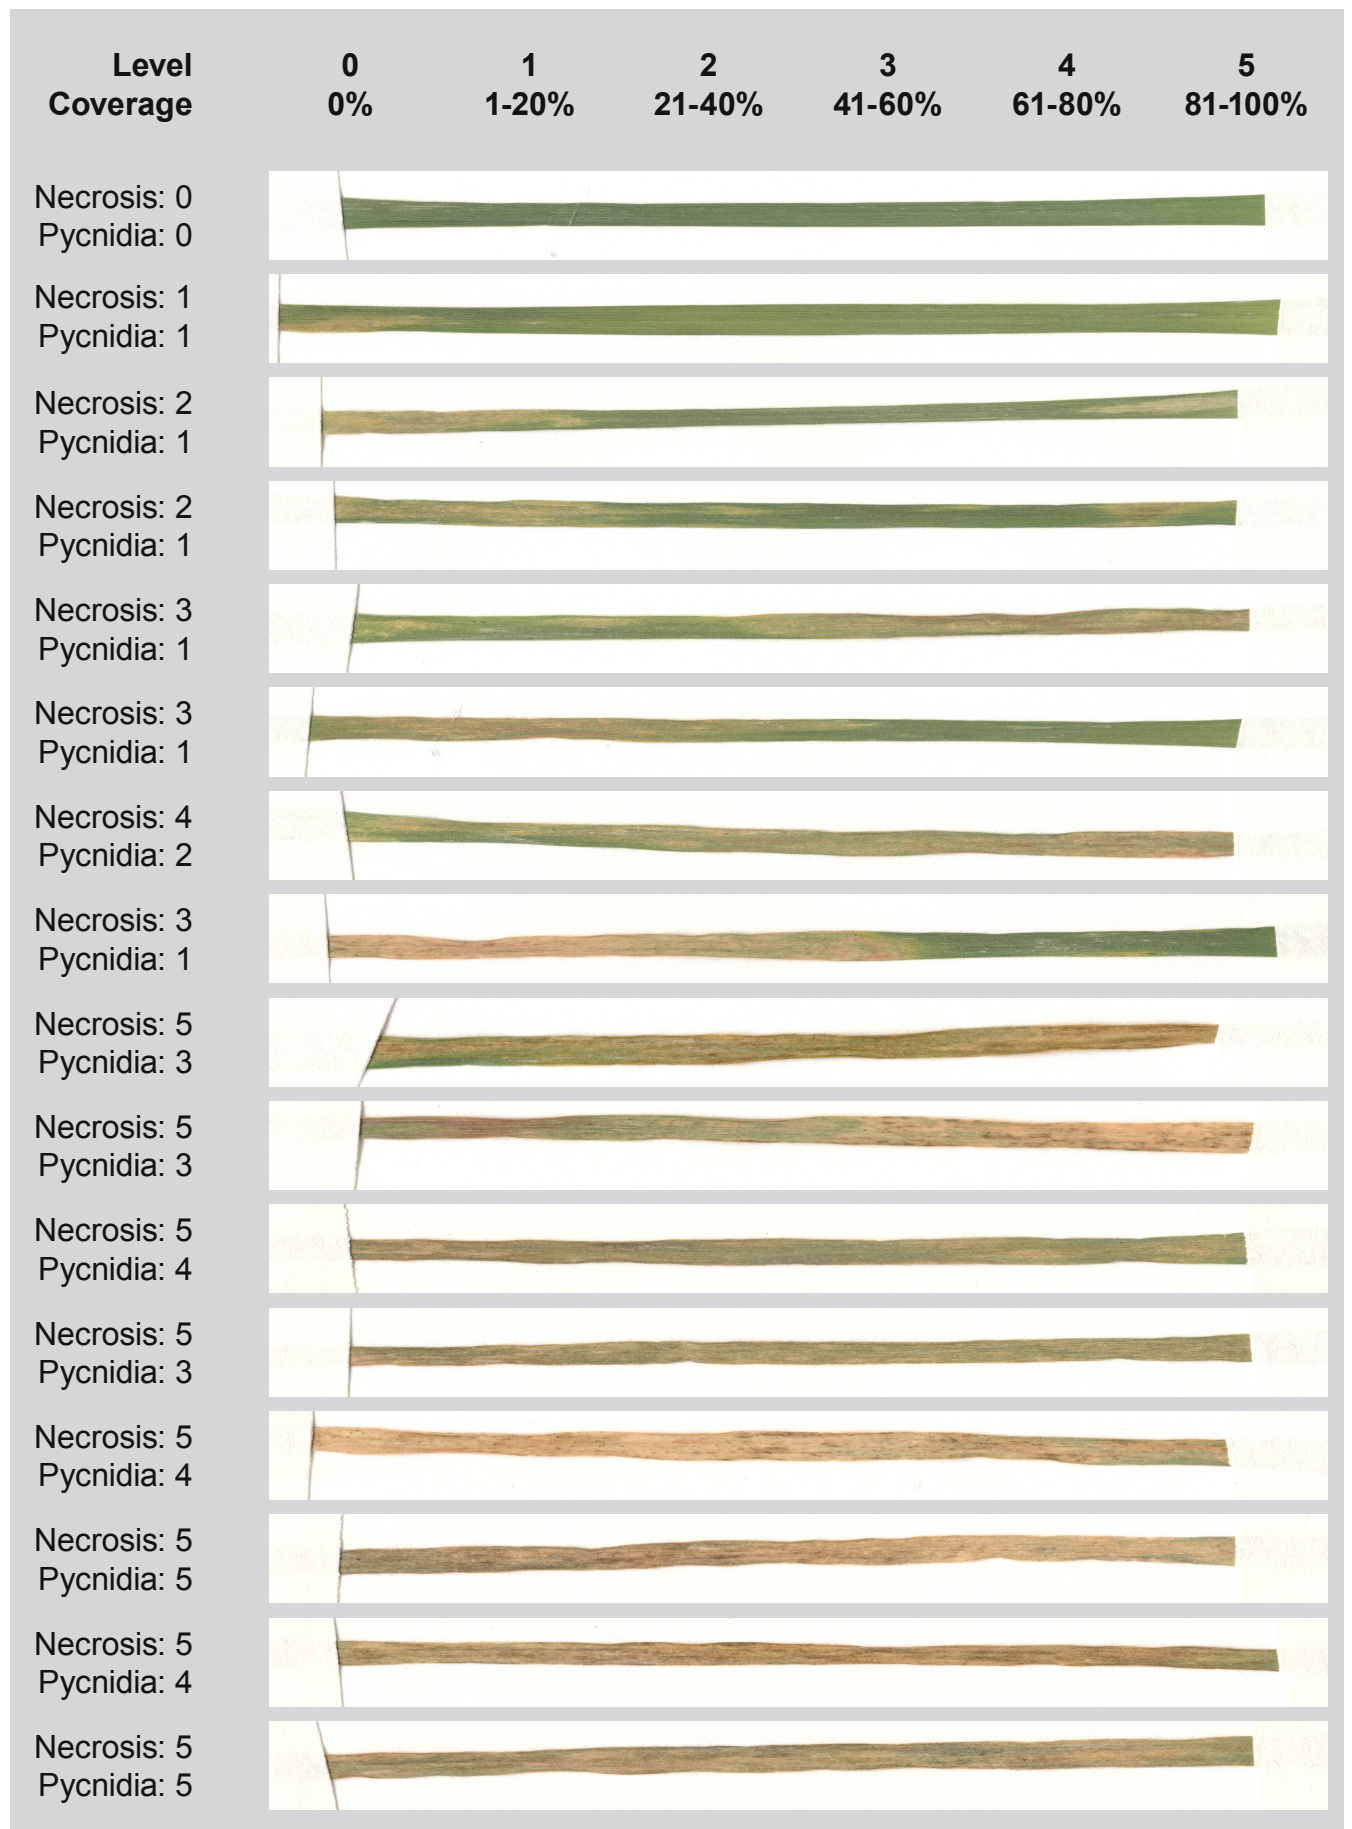

Figure S2

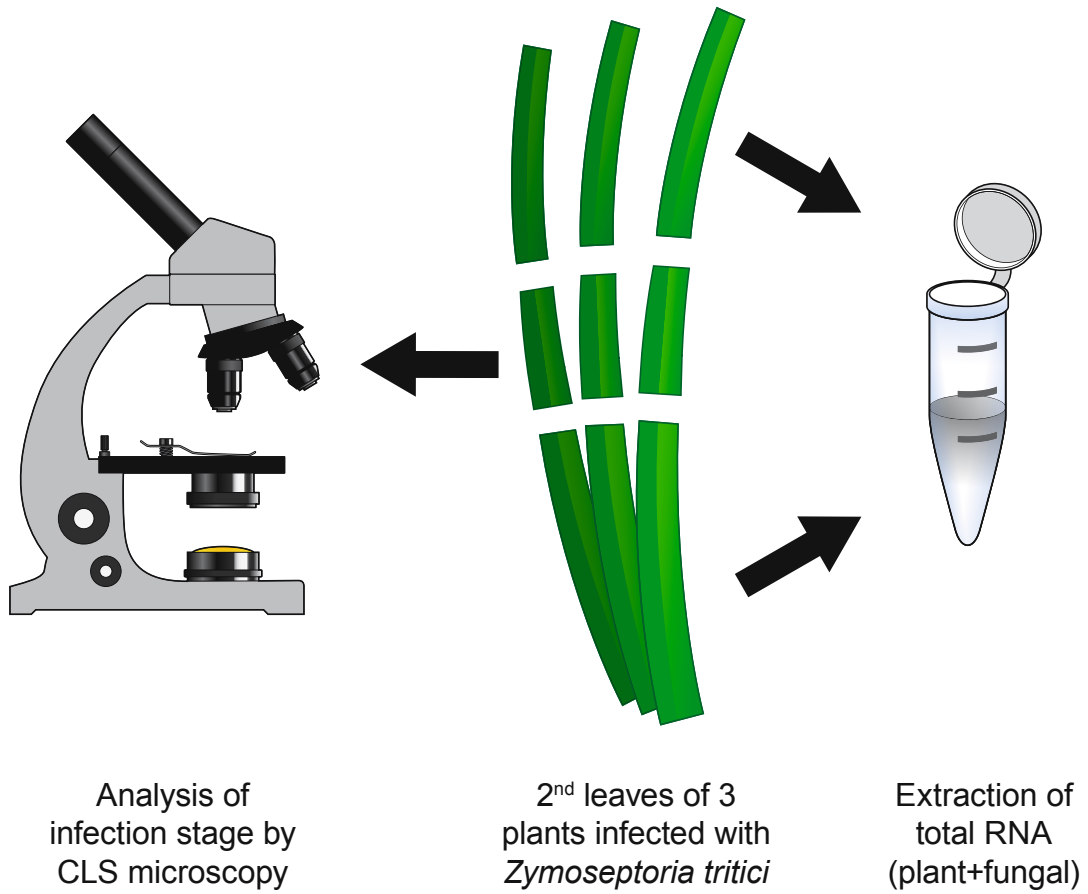

Figure S3

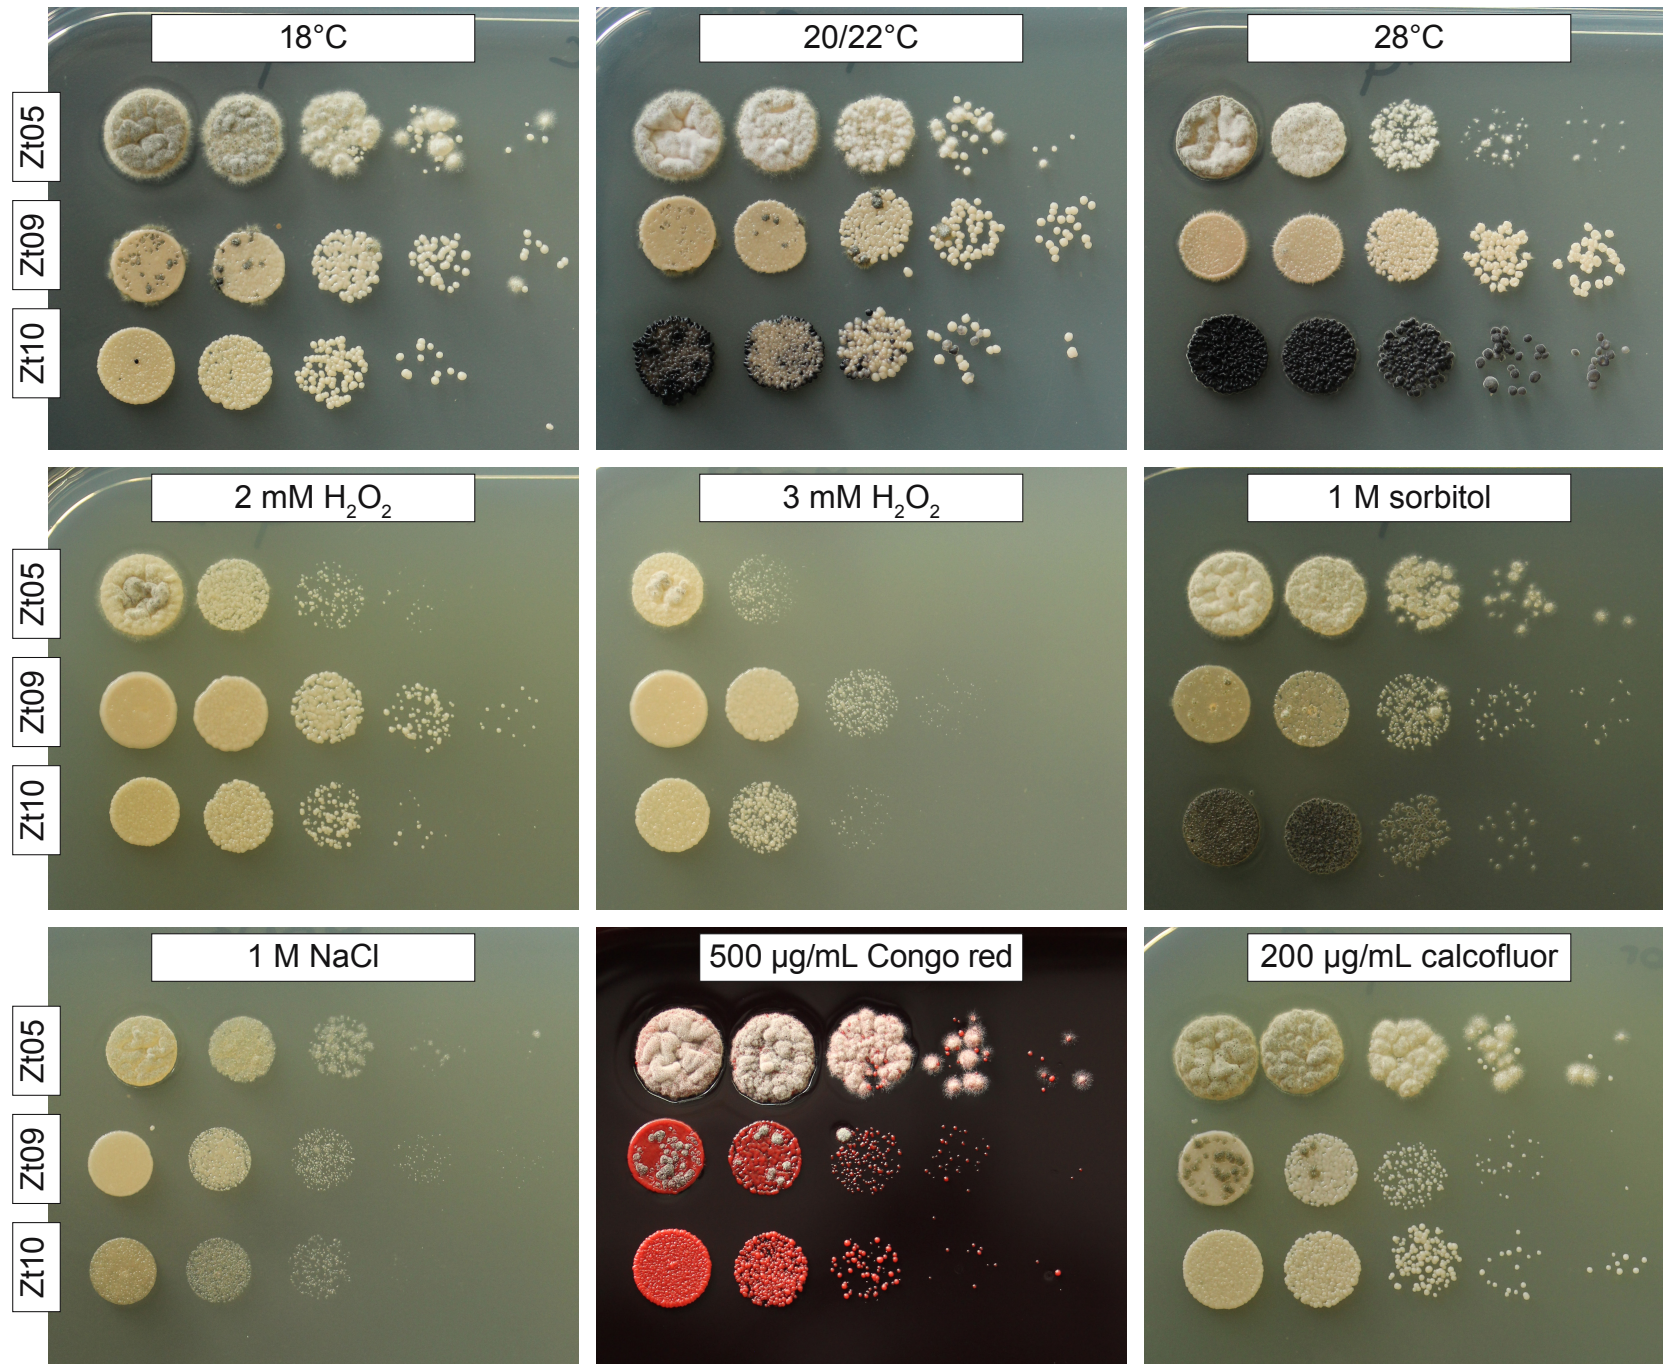

**Figure S4**

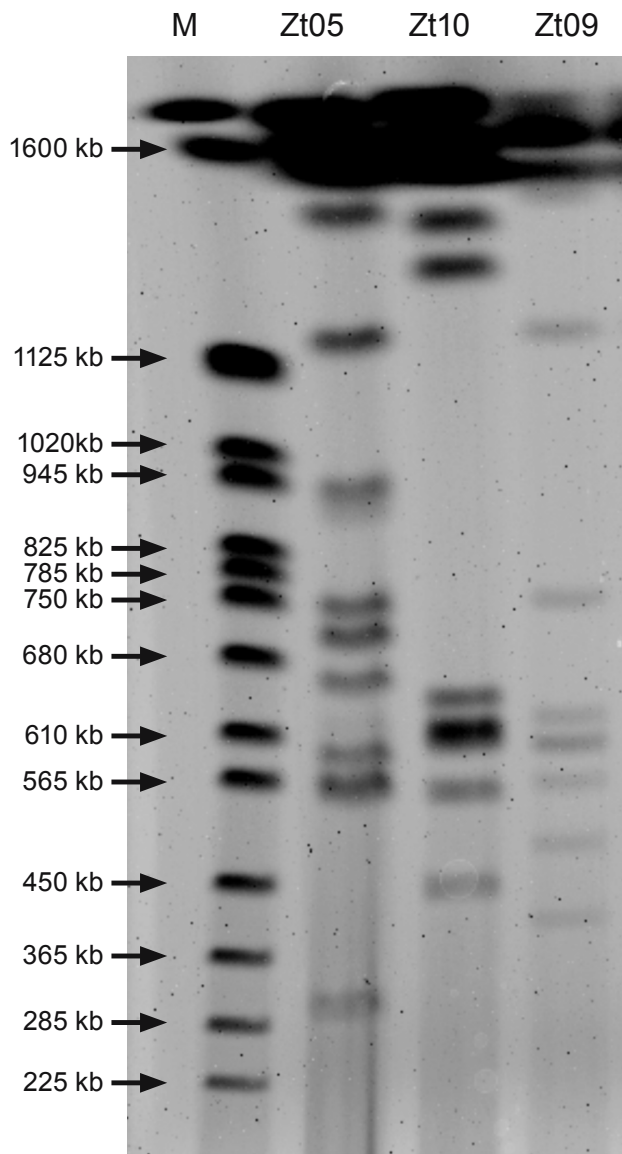

Figure S5

**A** IPO323 chromosomes - Zt05 unitigs

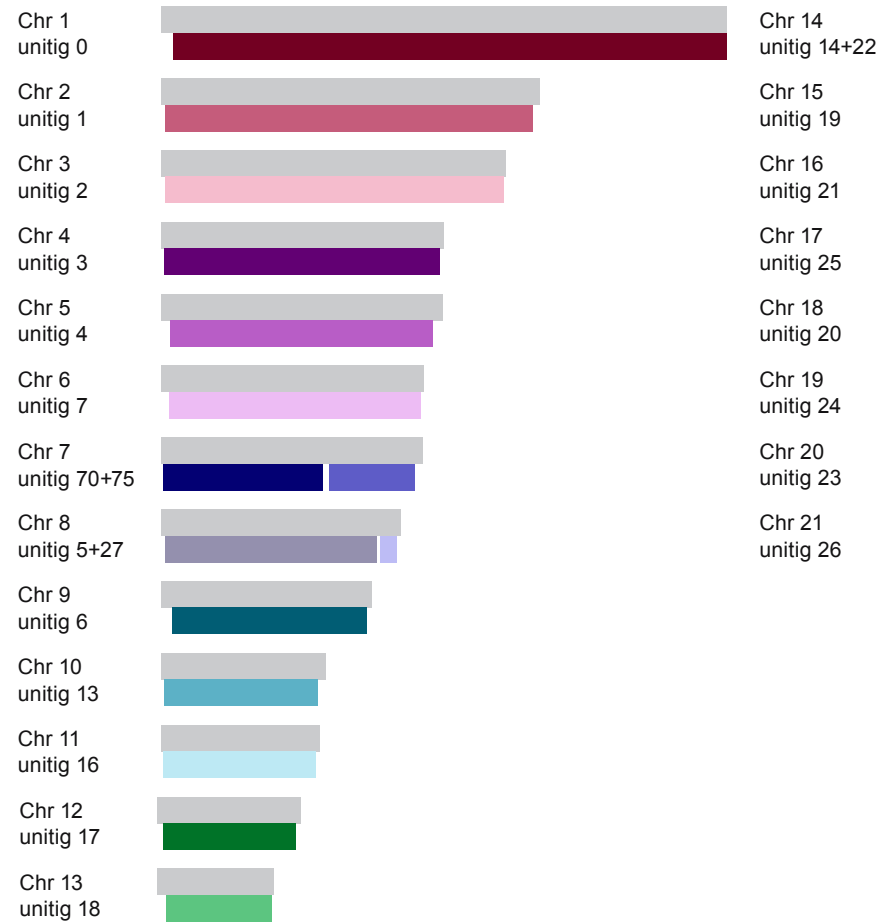

**B** IPO323 chromosomes - Zt10 unitigs

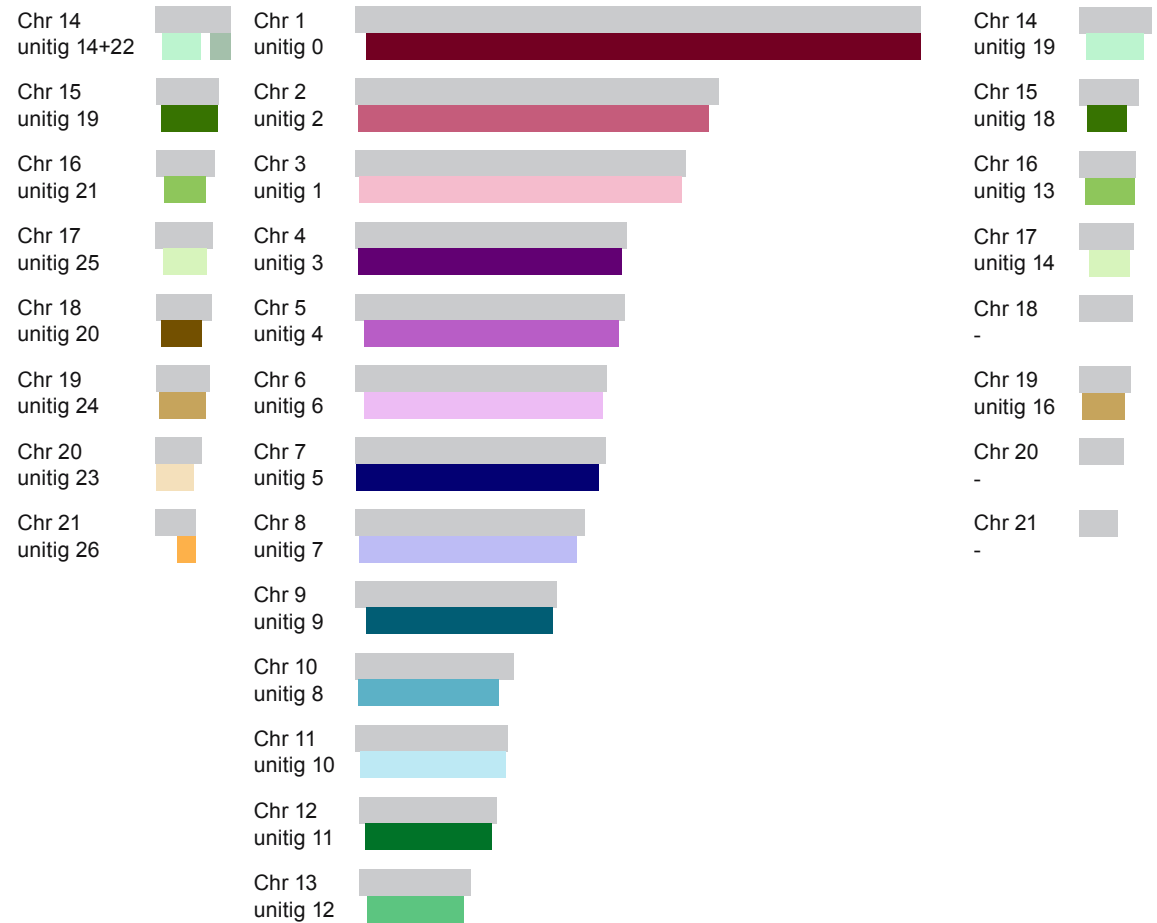

Figure S6

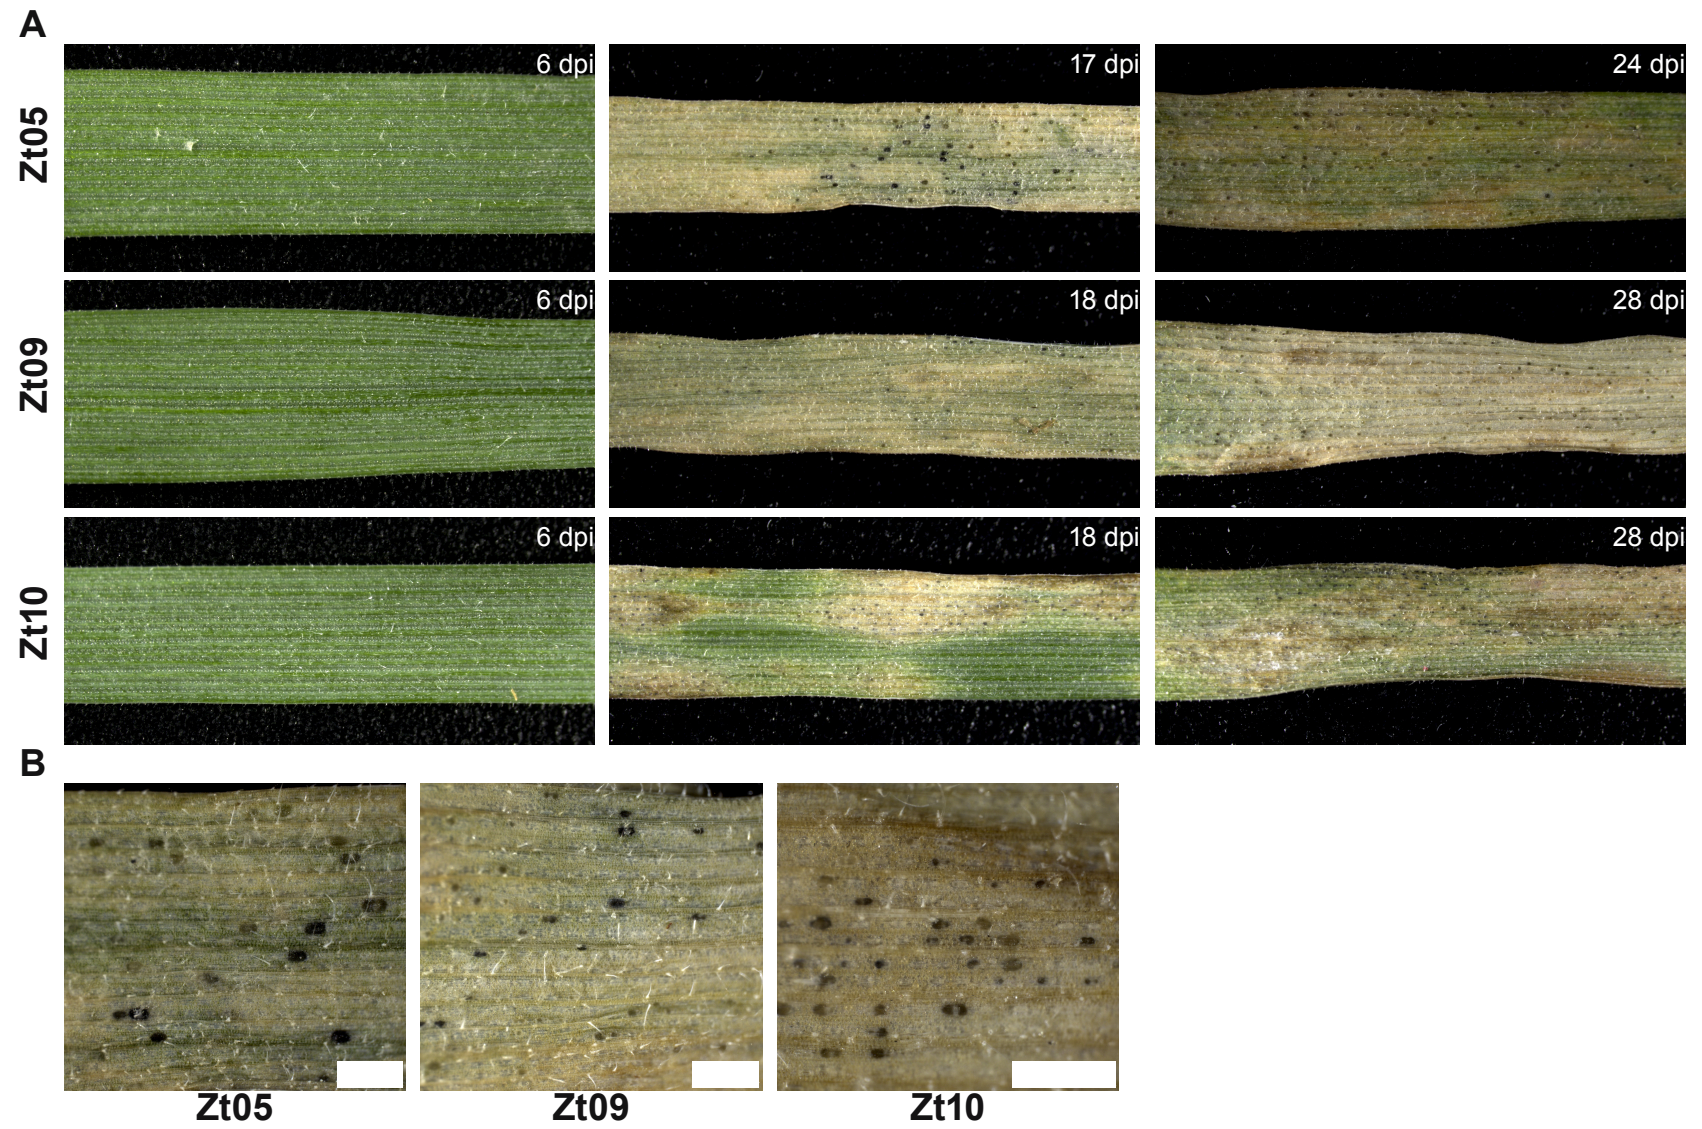

Figure S7

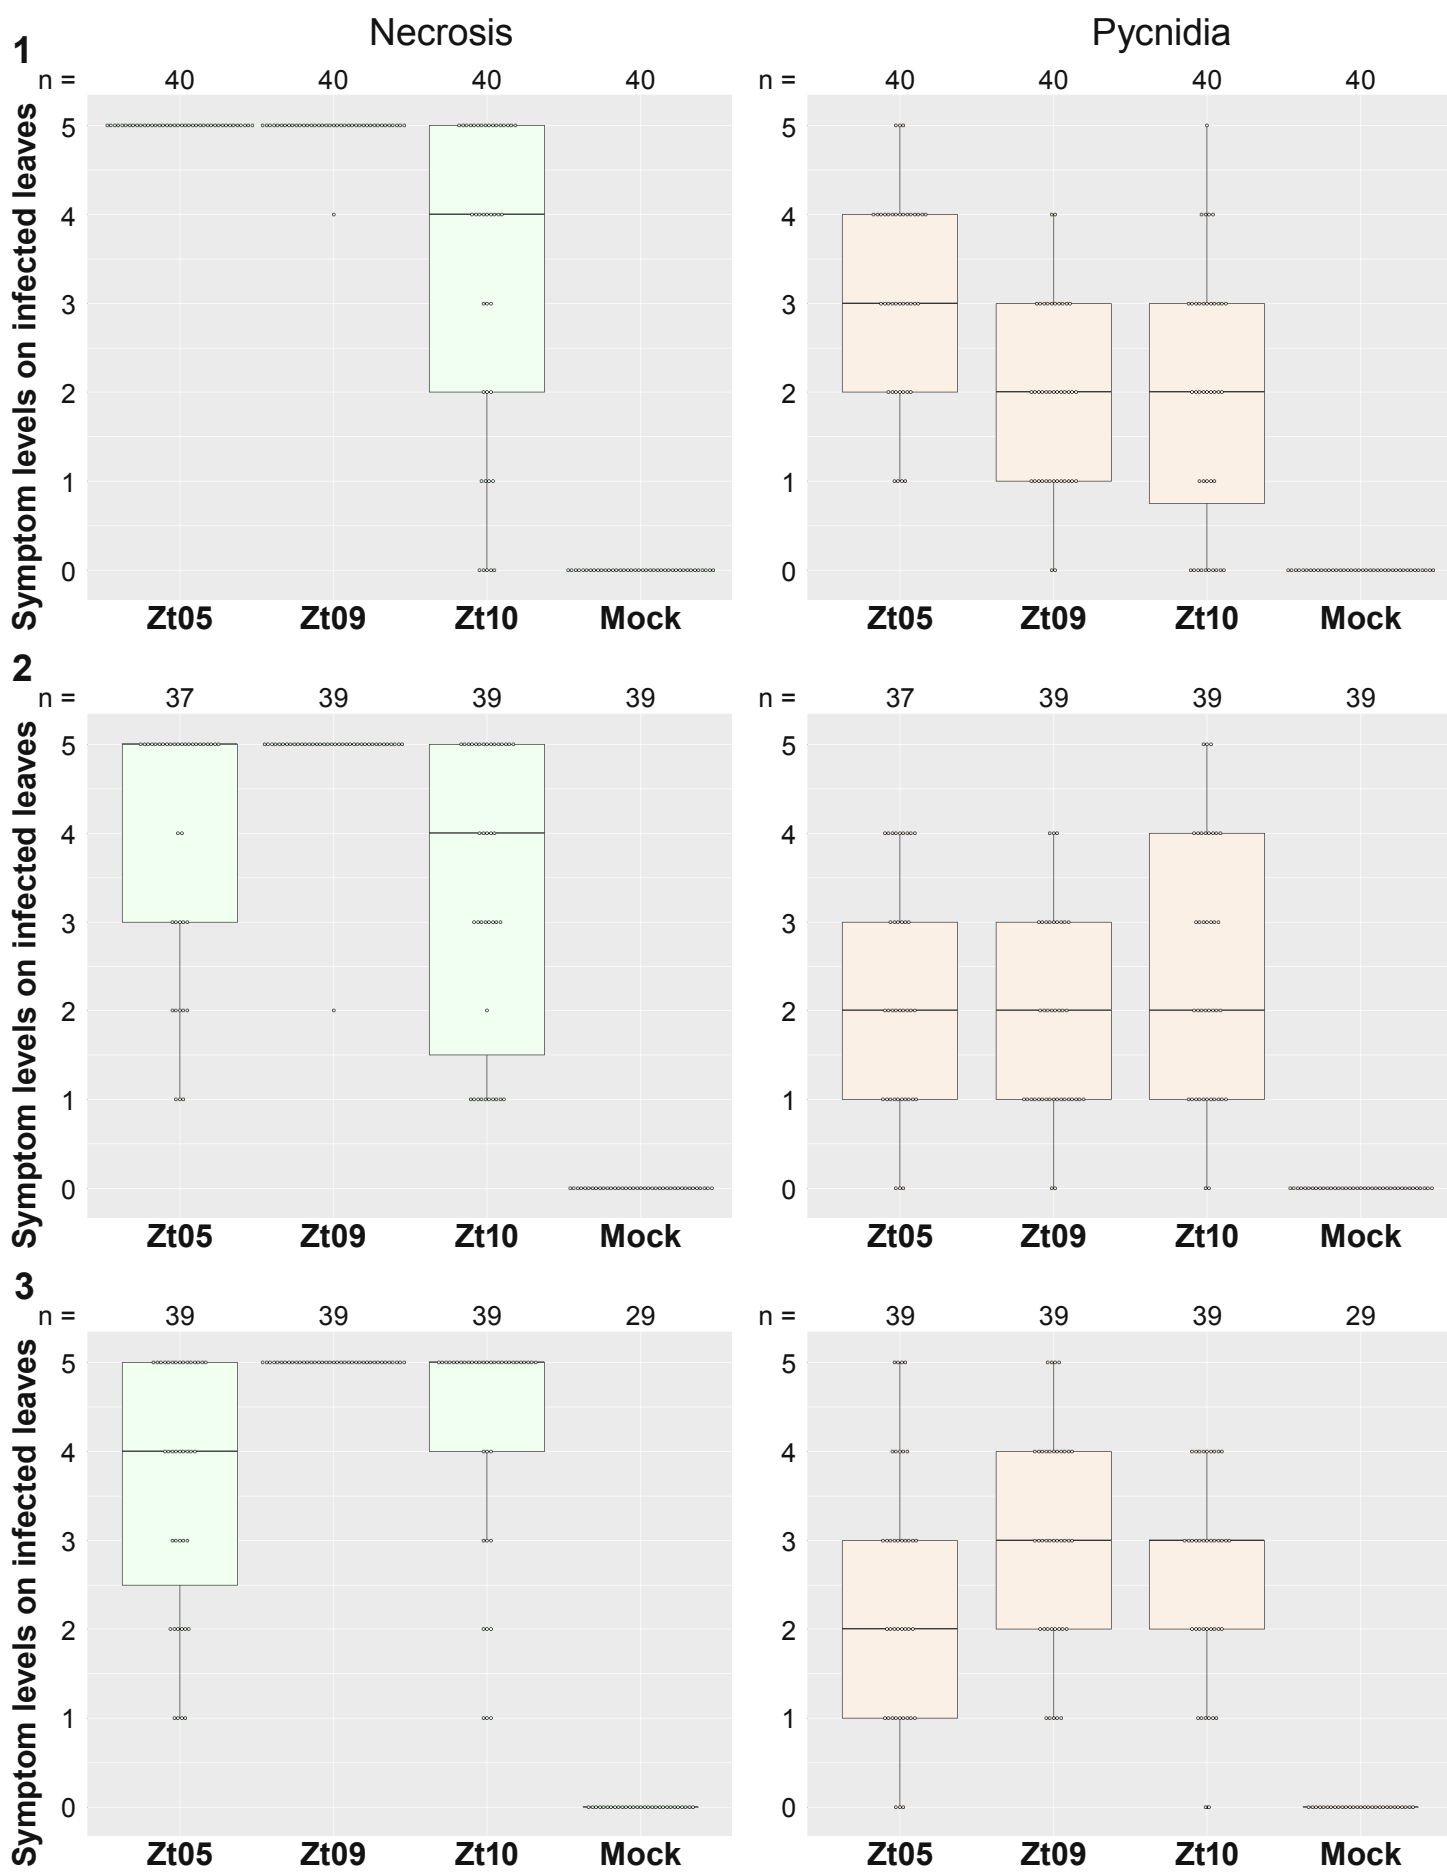

Figure S8

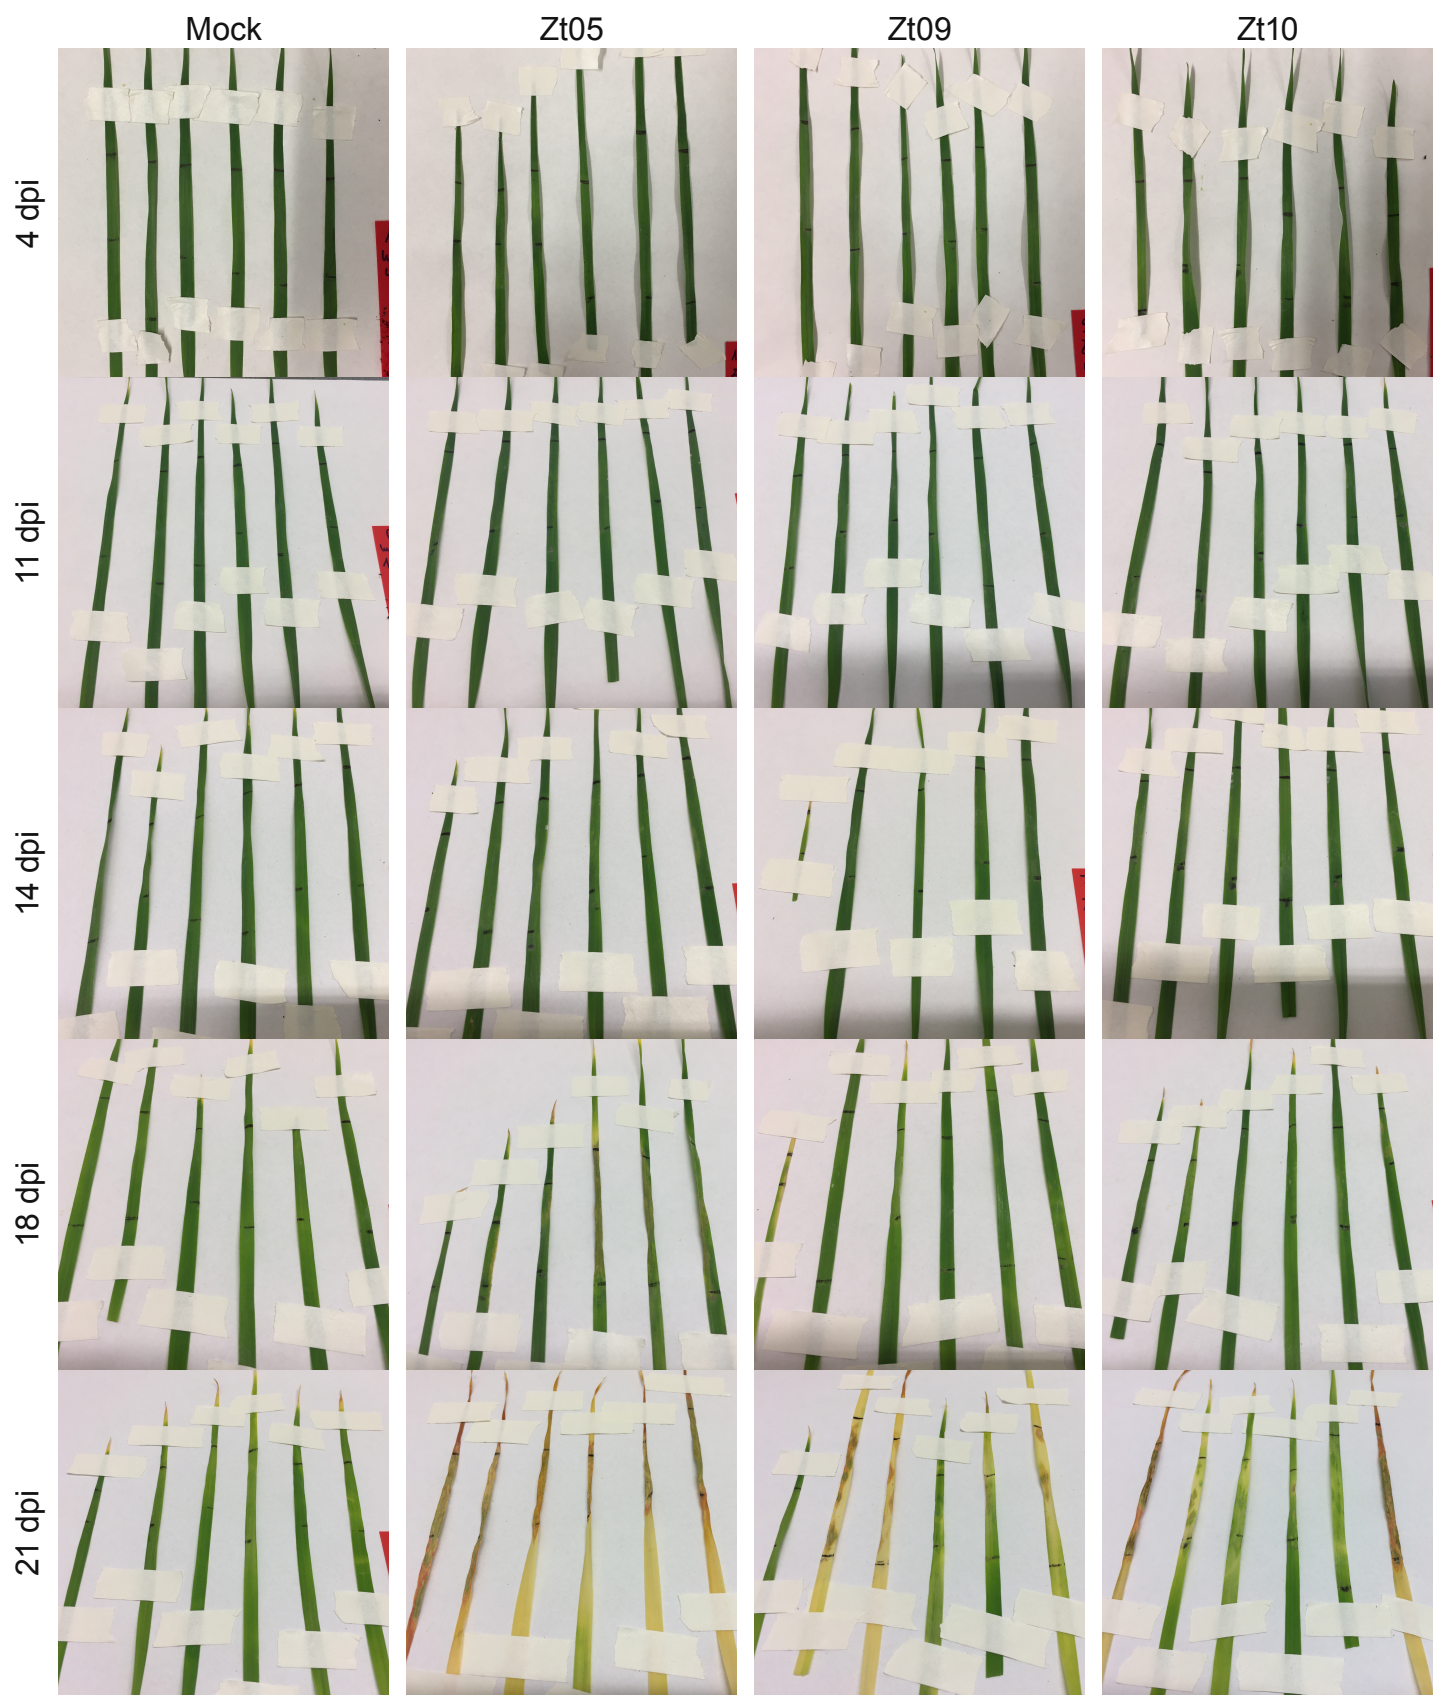



Figure S9

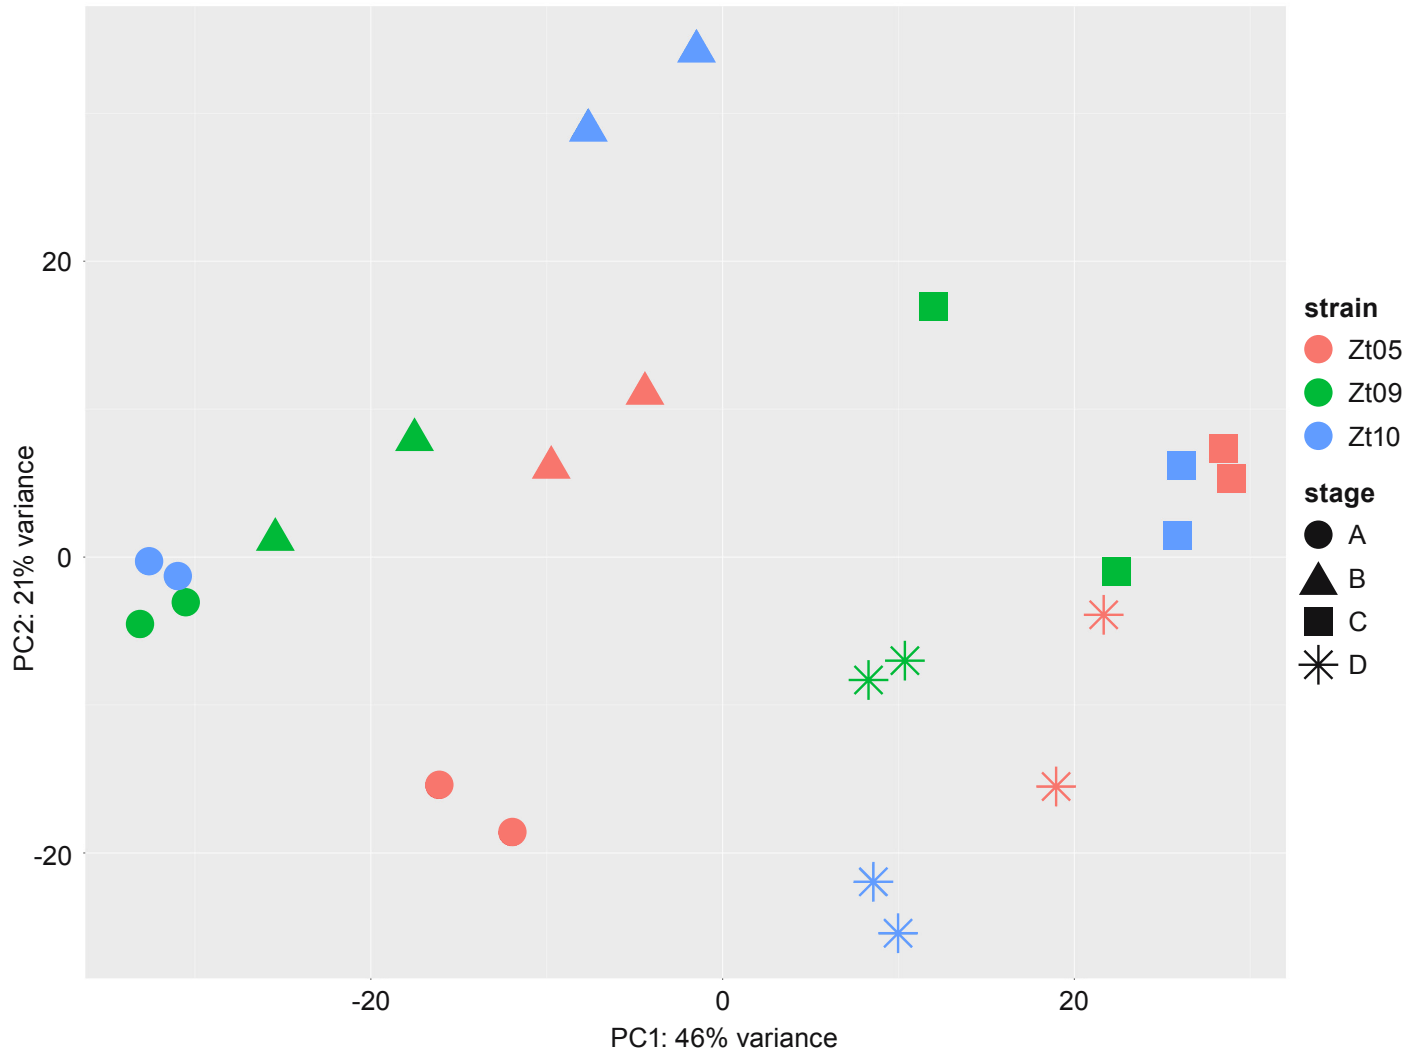

Figure S10

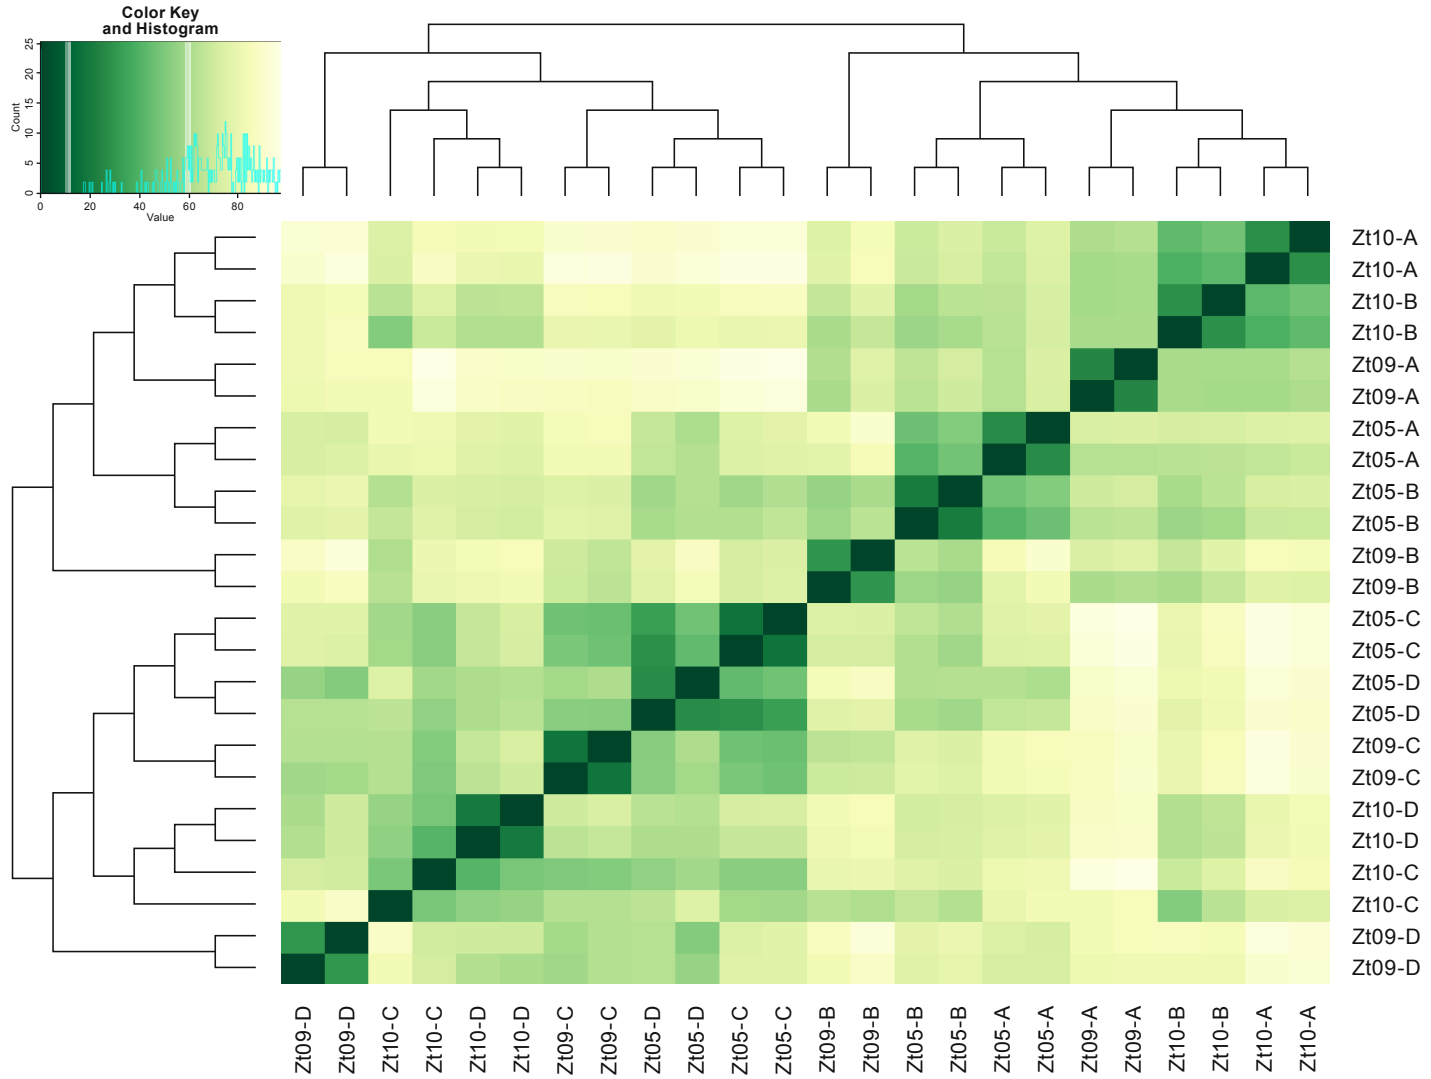

Figure S11

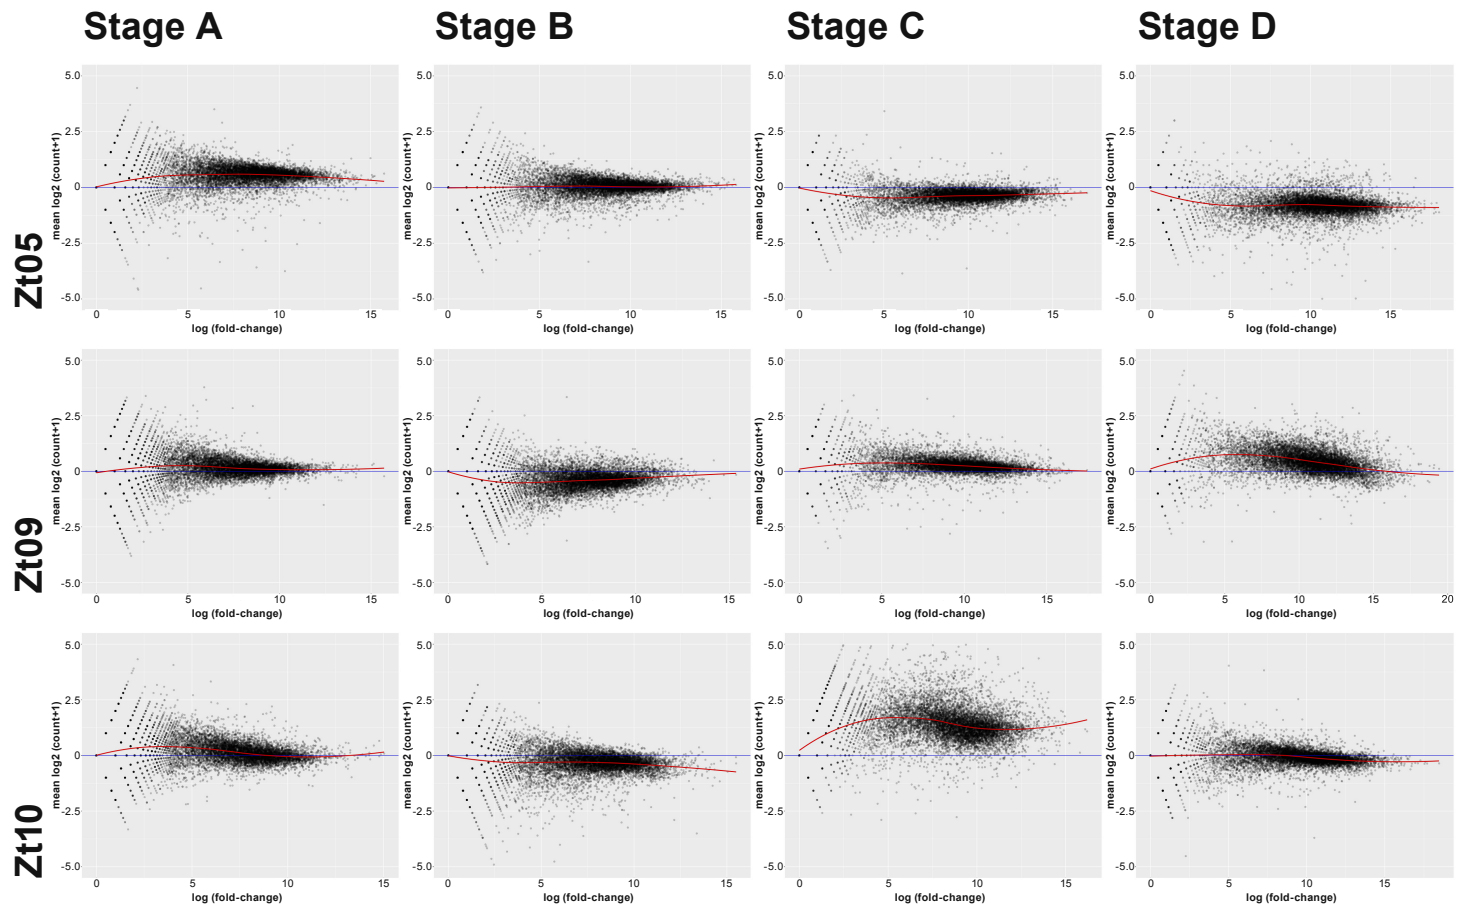

**Figure S12**

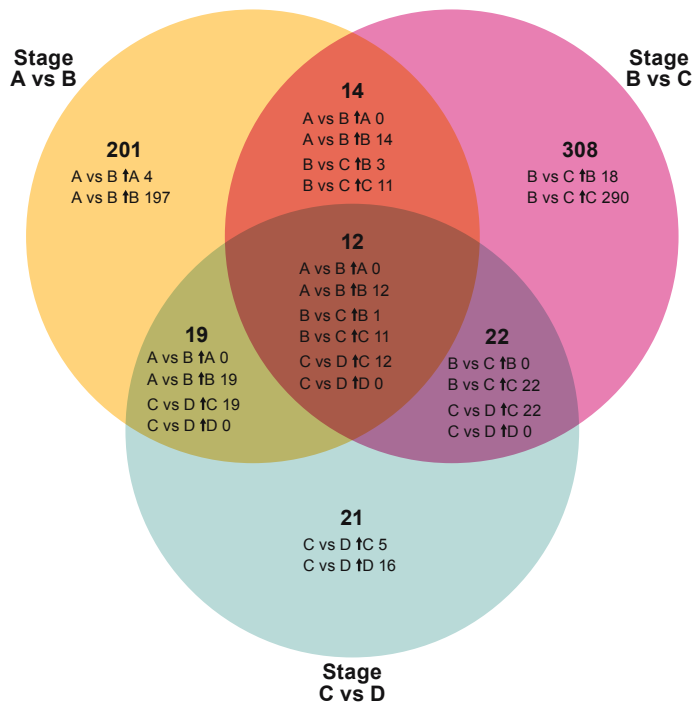

Figure S13\_1

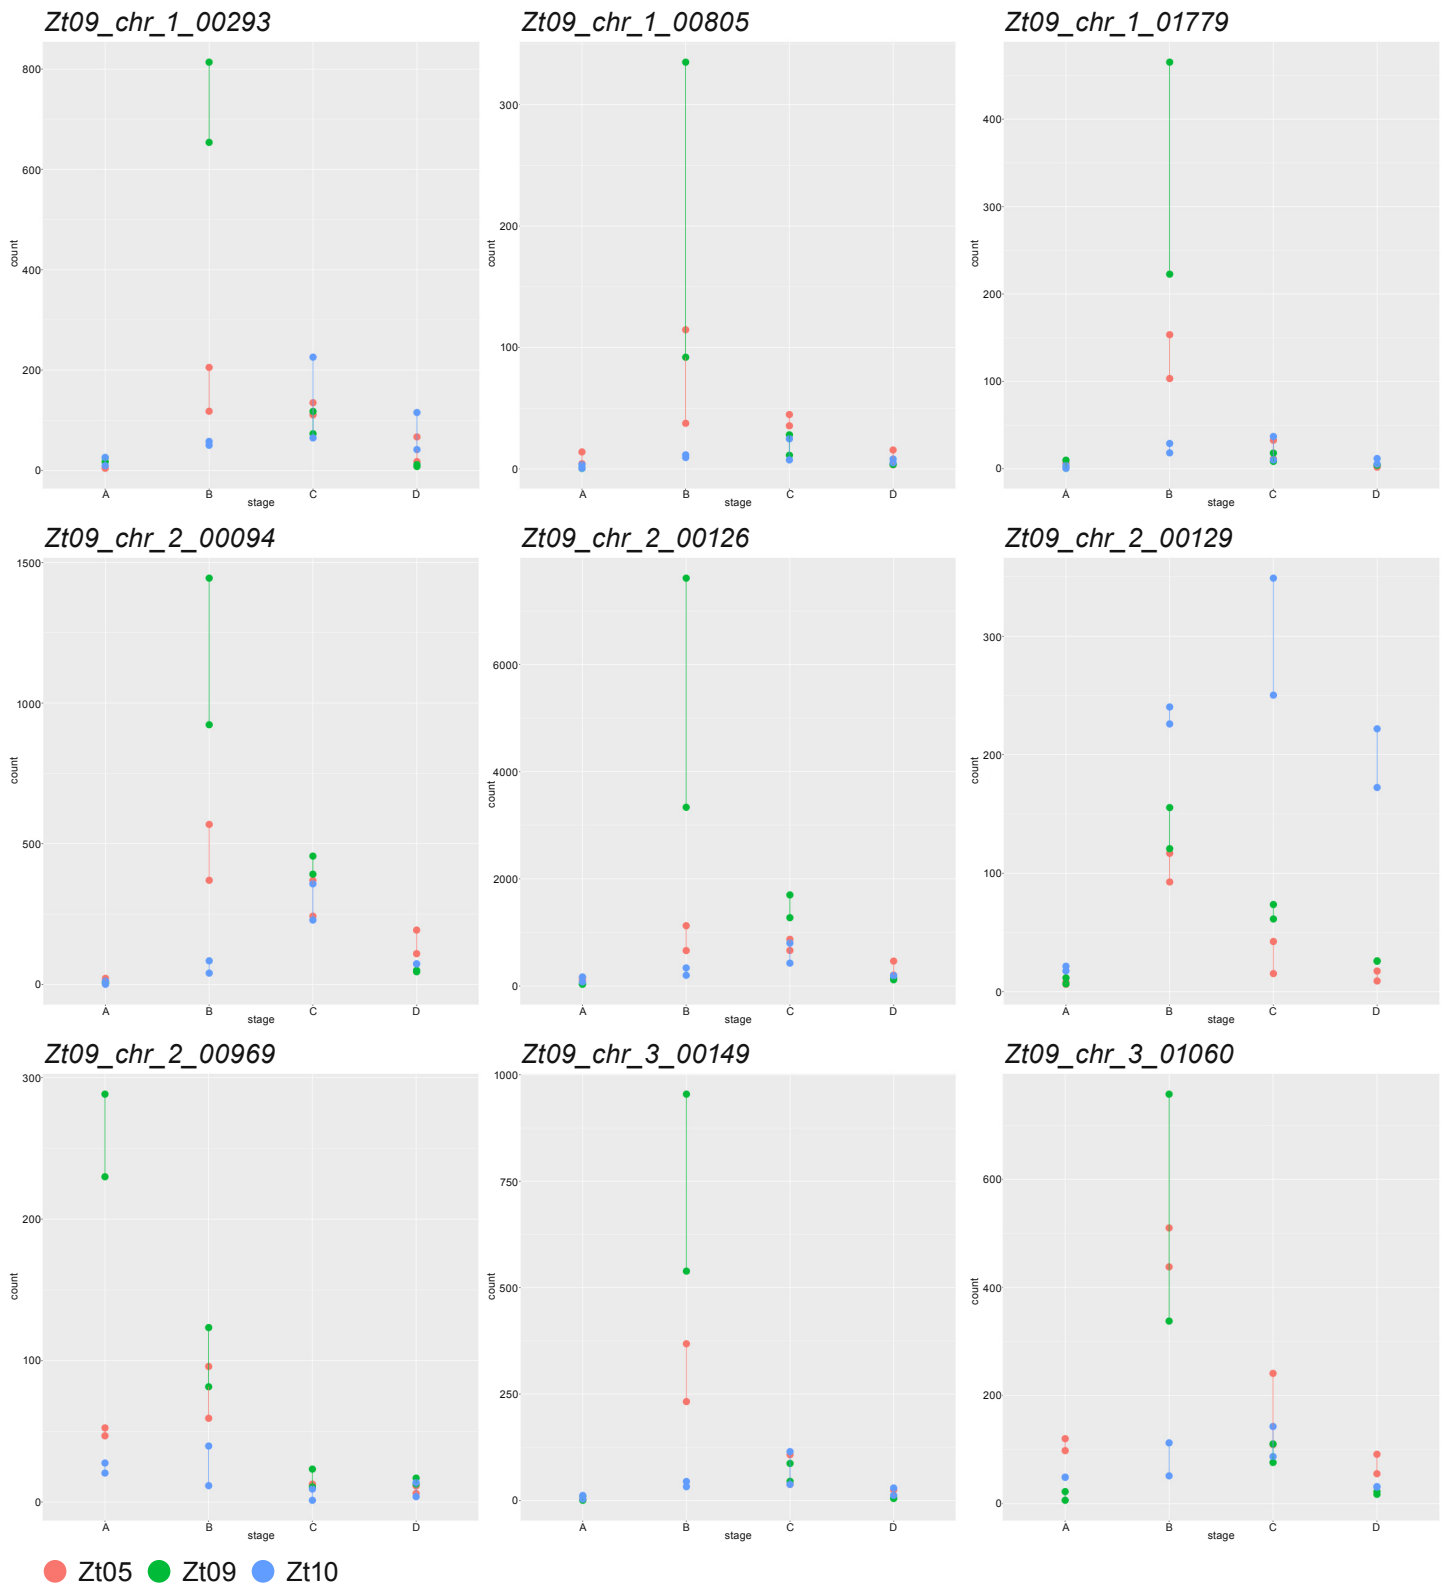

# Figure S13\_2

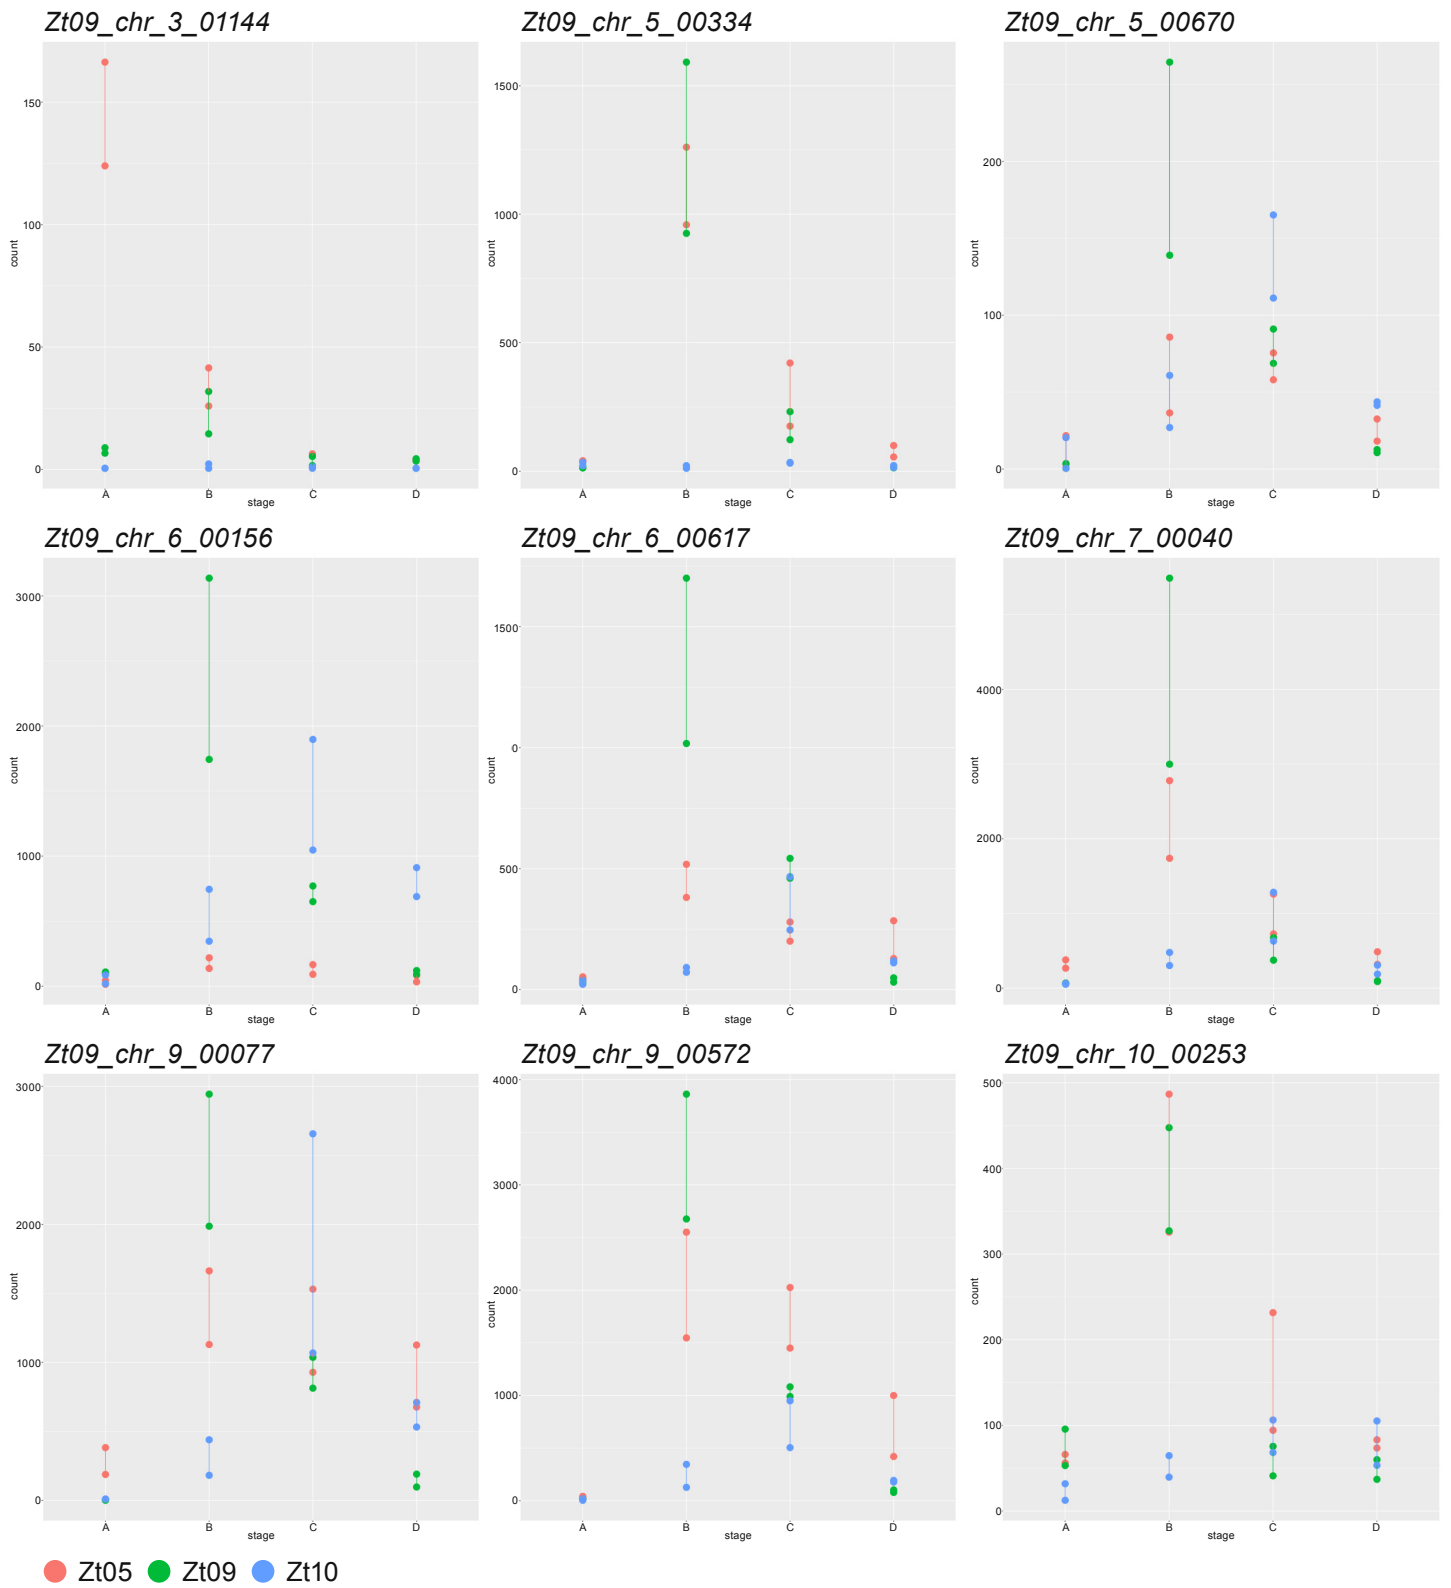

Figure S13\_3

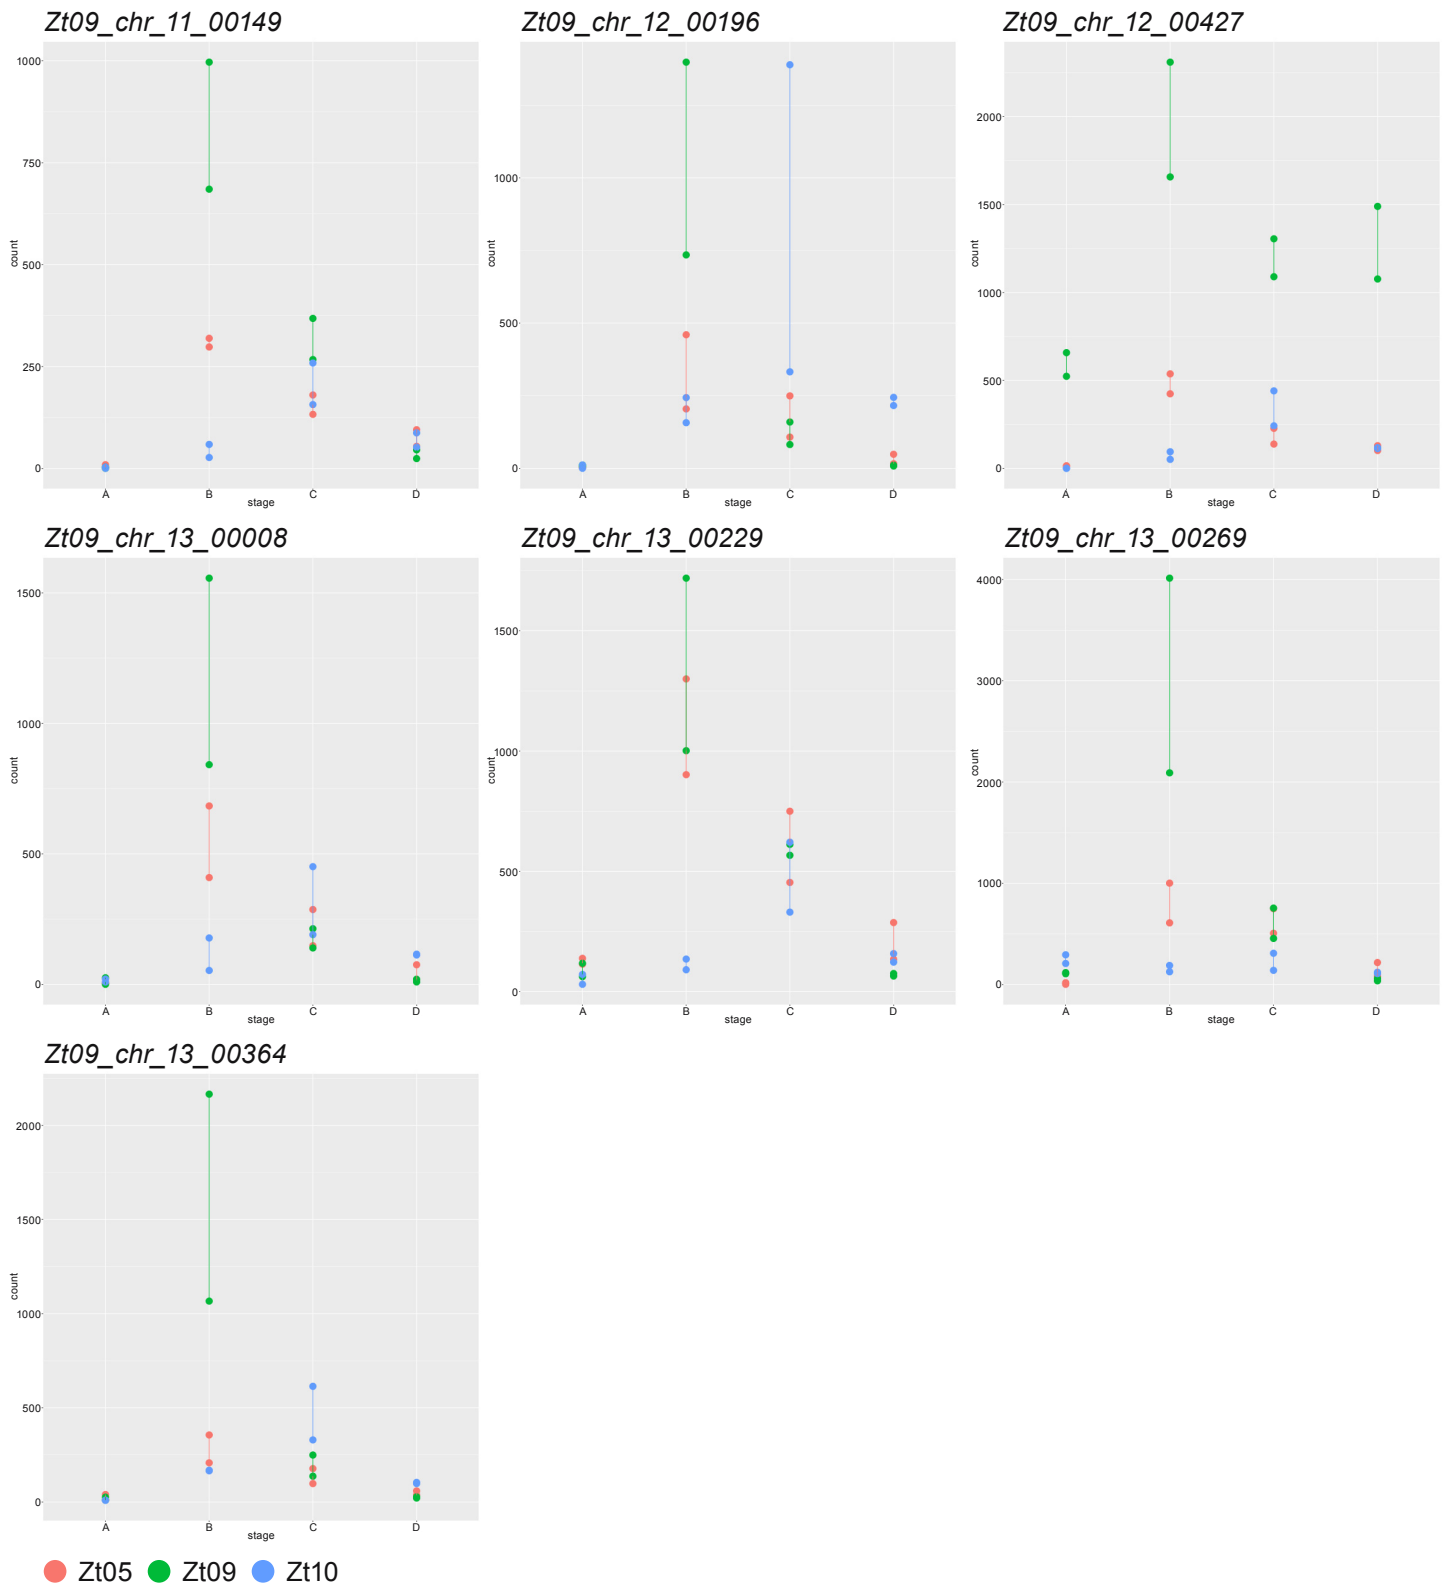

# Figure S14\_1

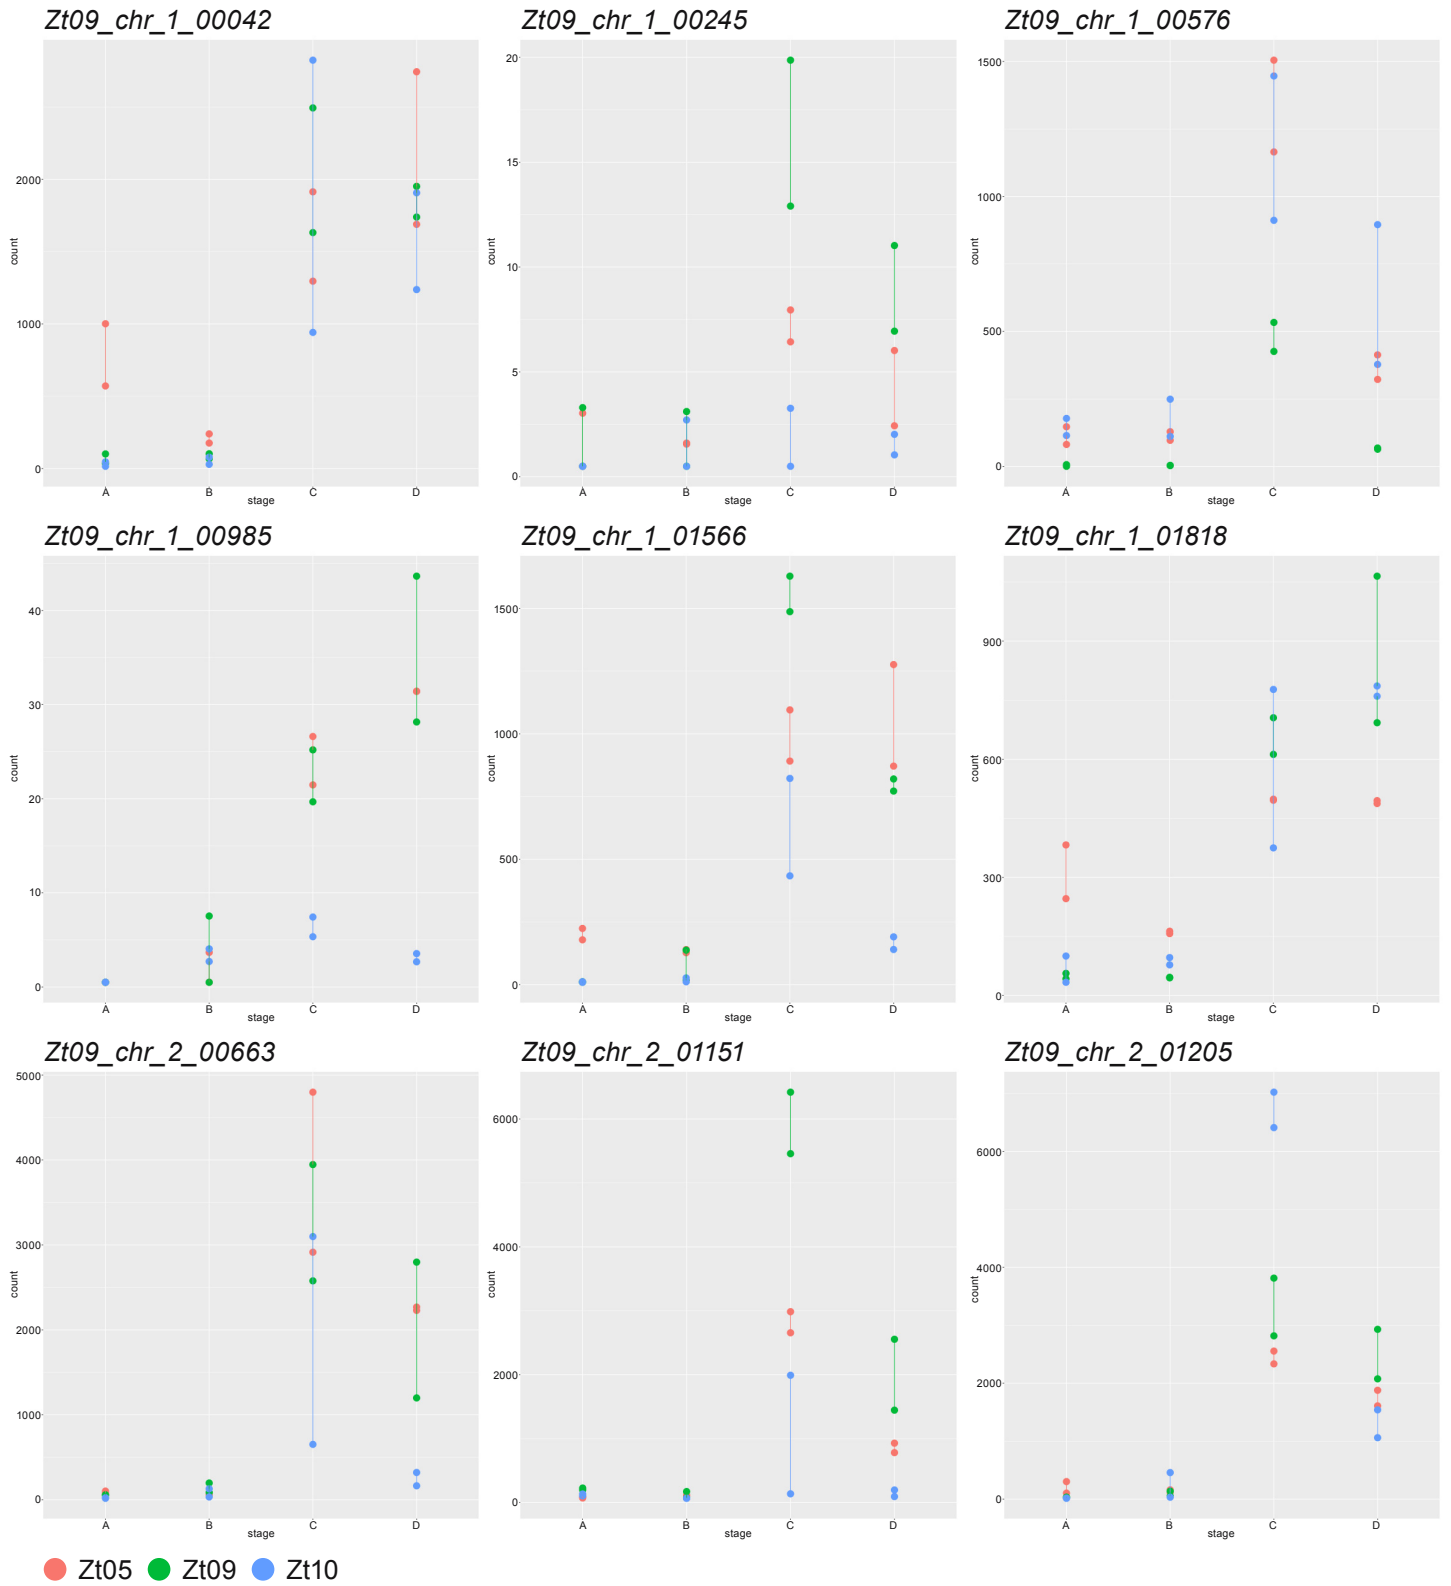



# Figure S14\_2

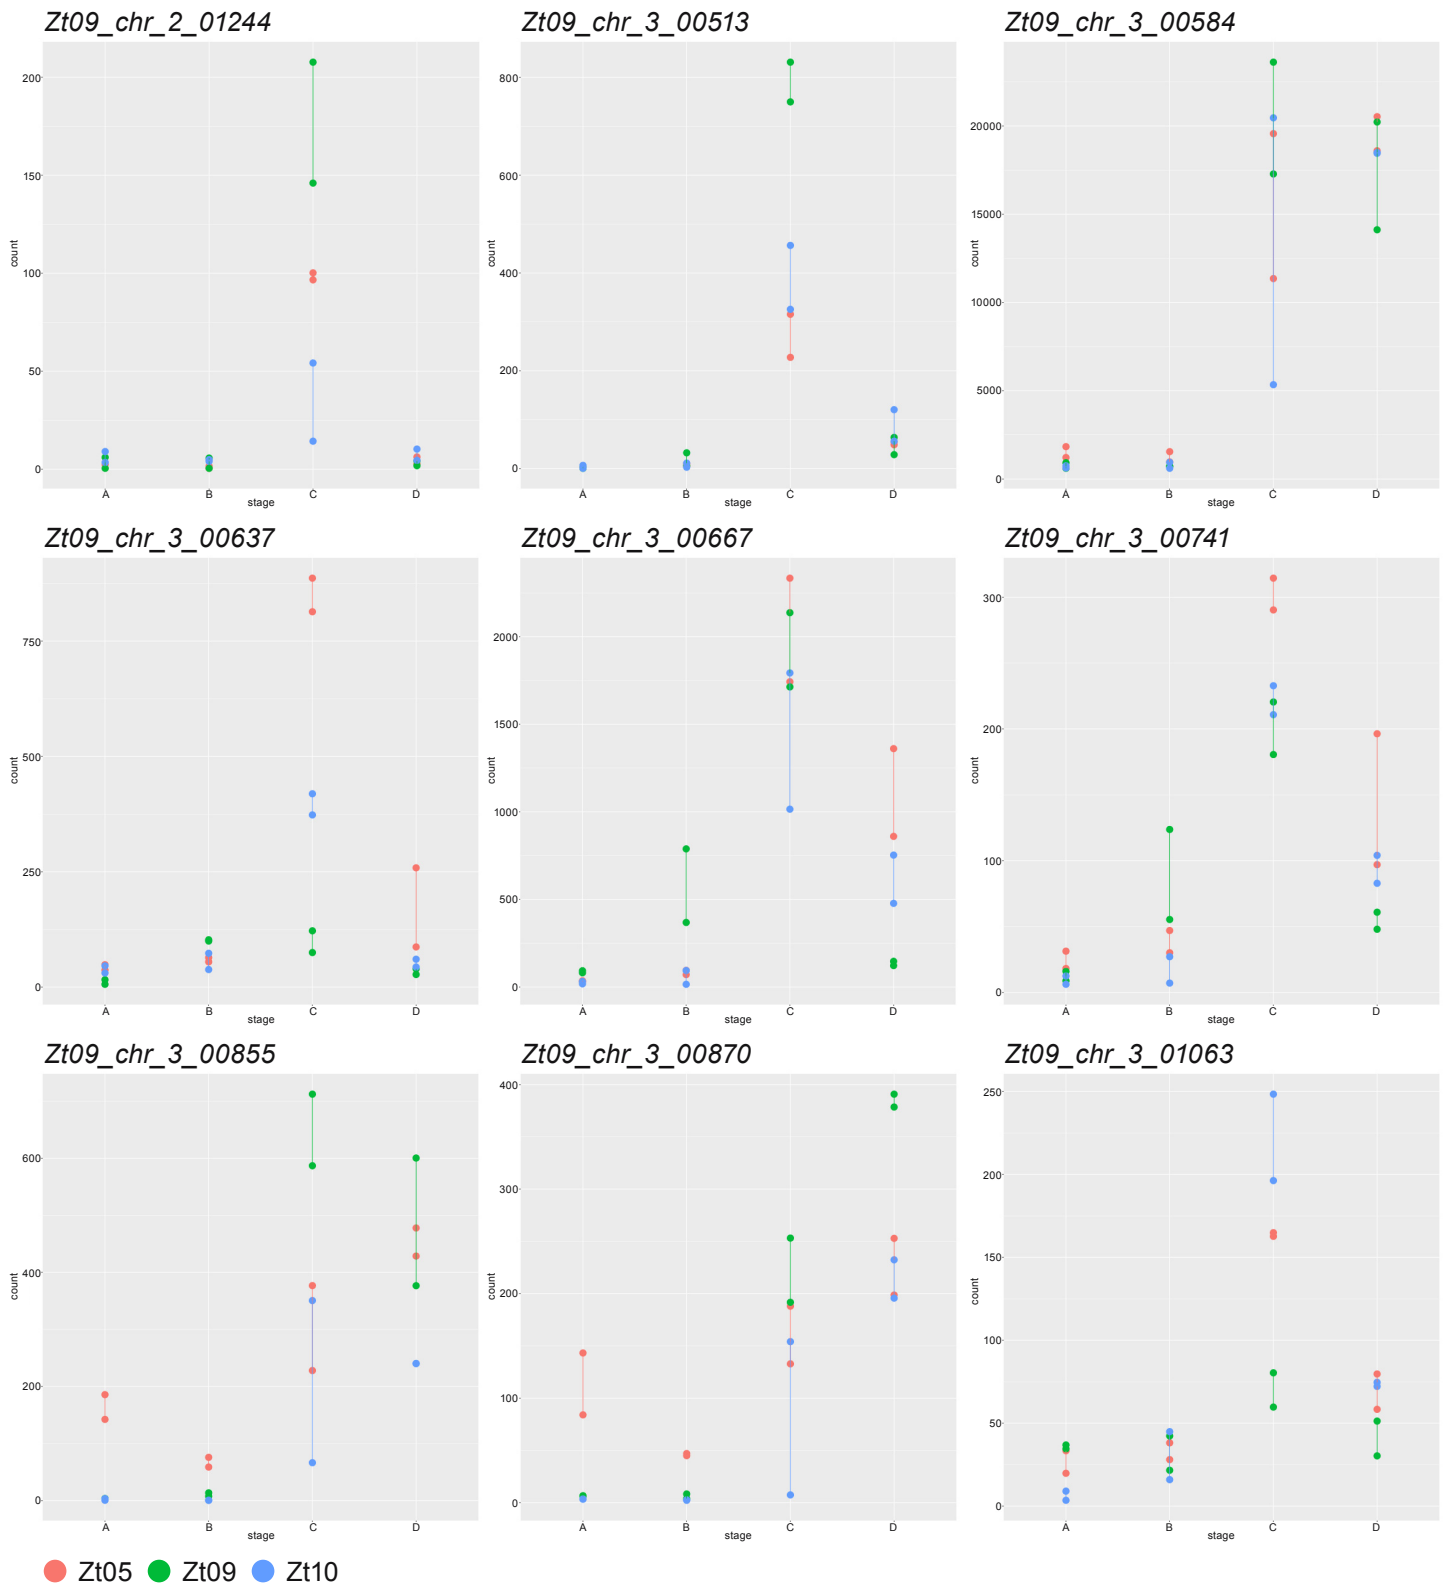

# Figure S14\_3

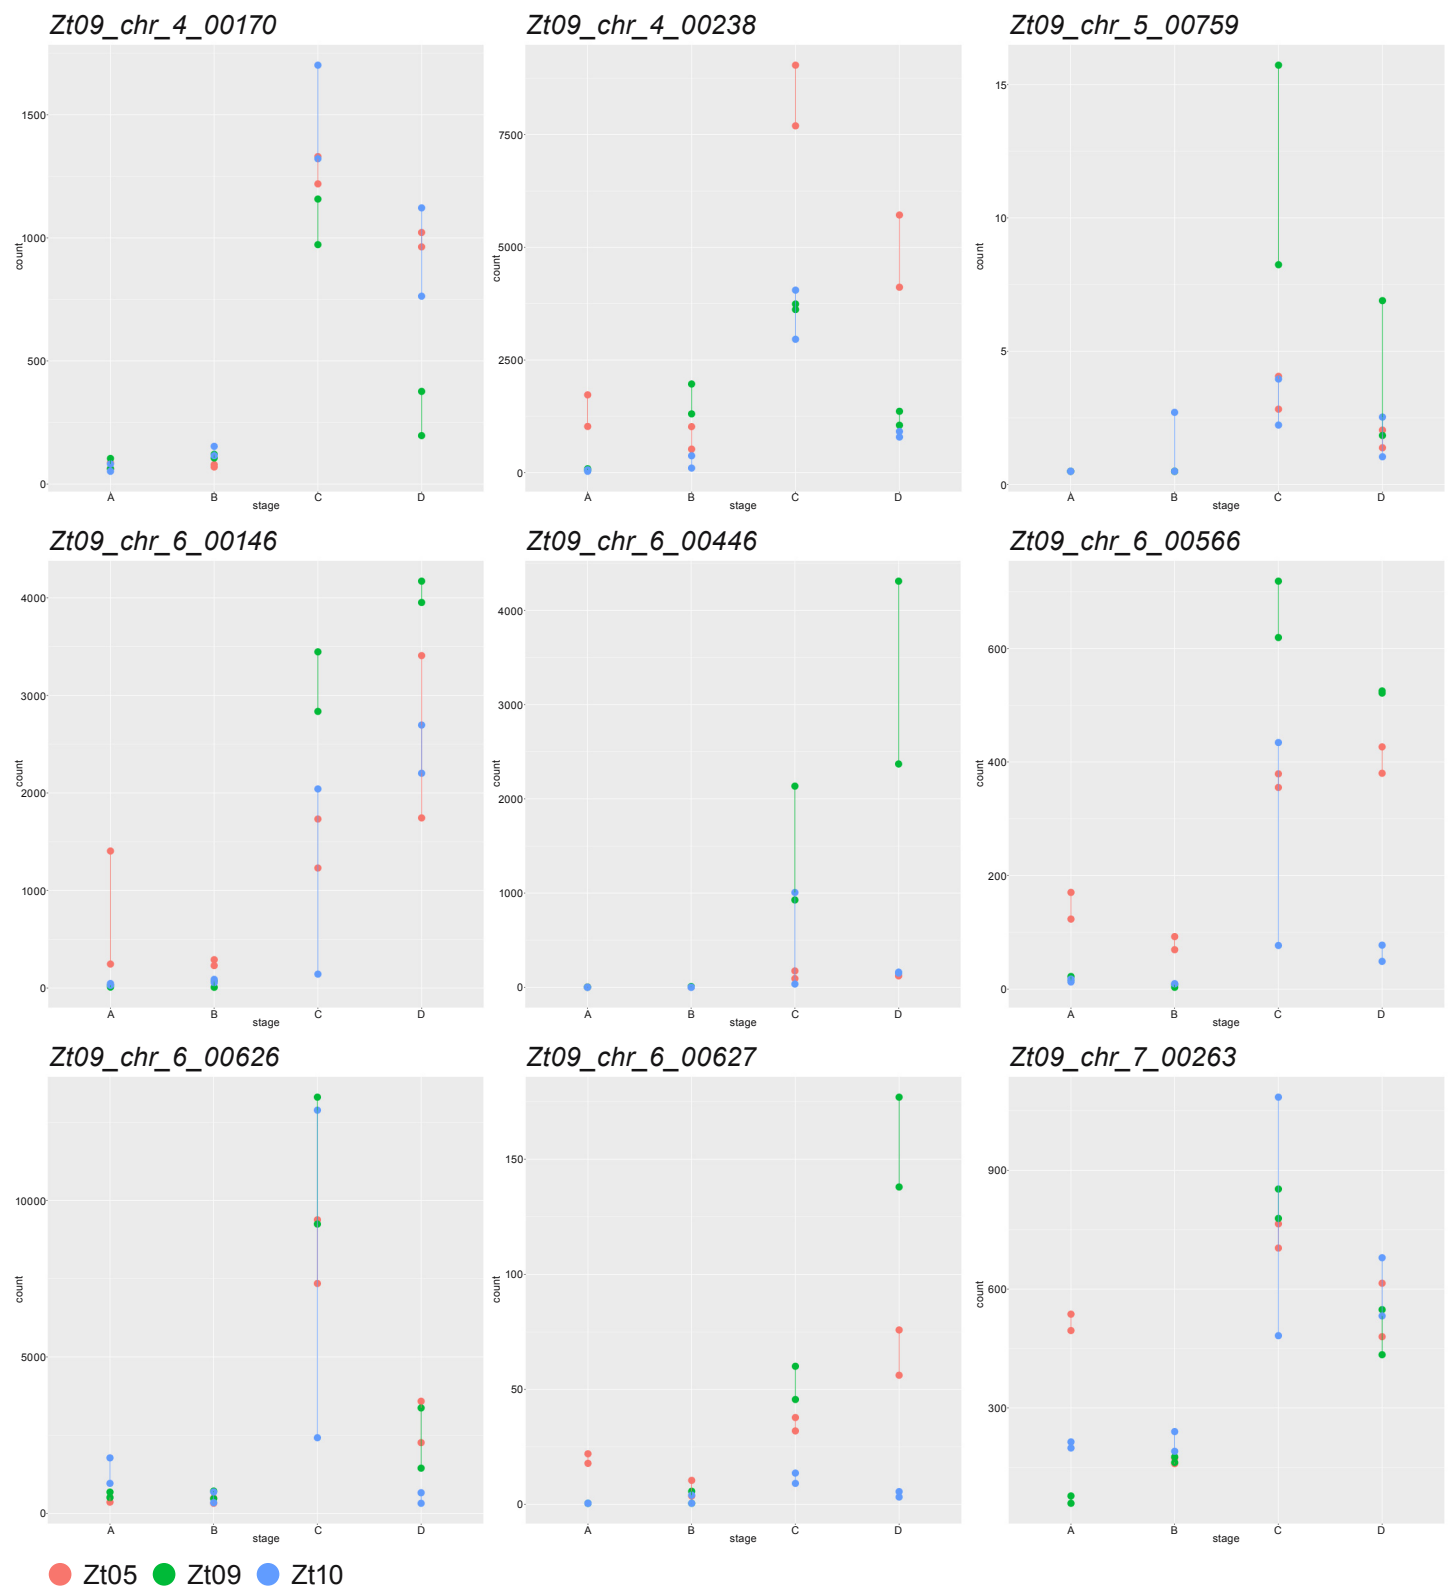

# Figure S14\_4

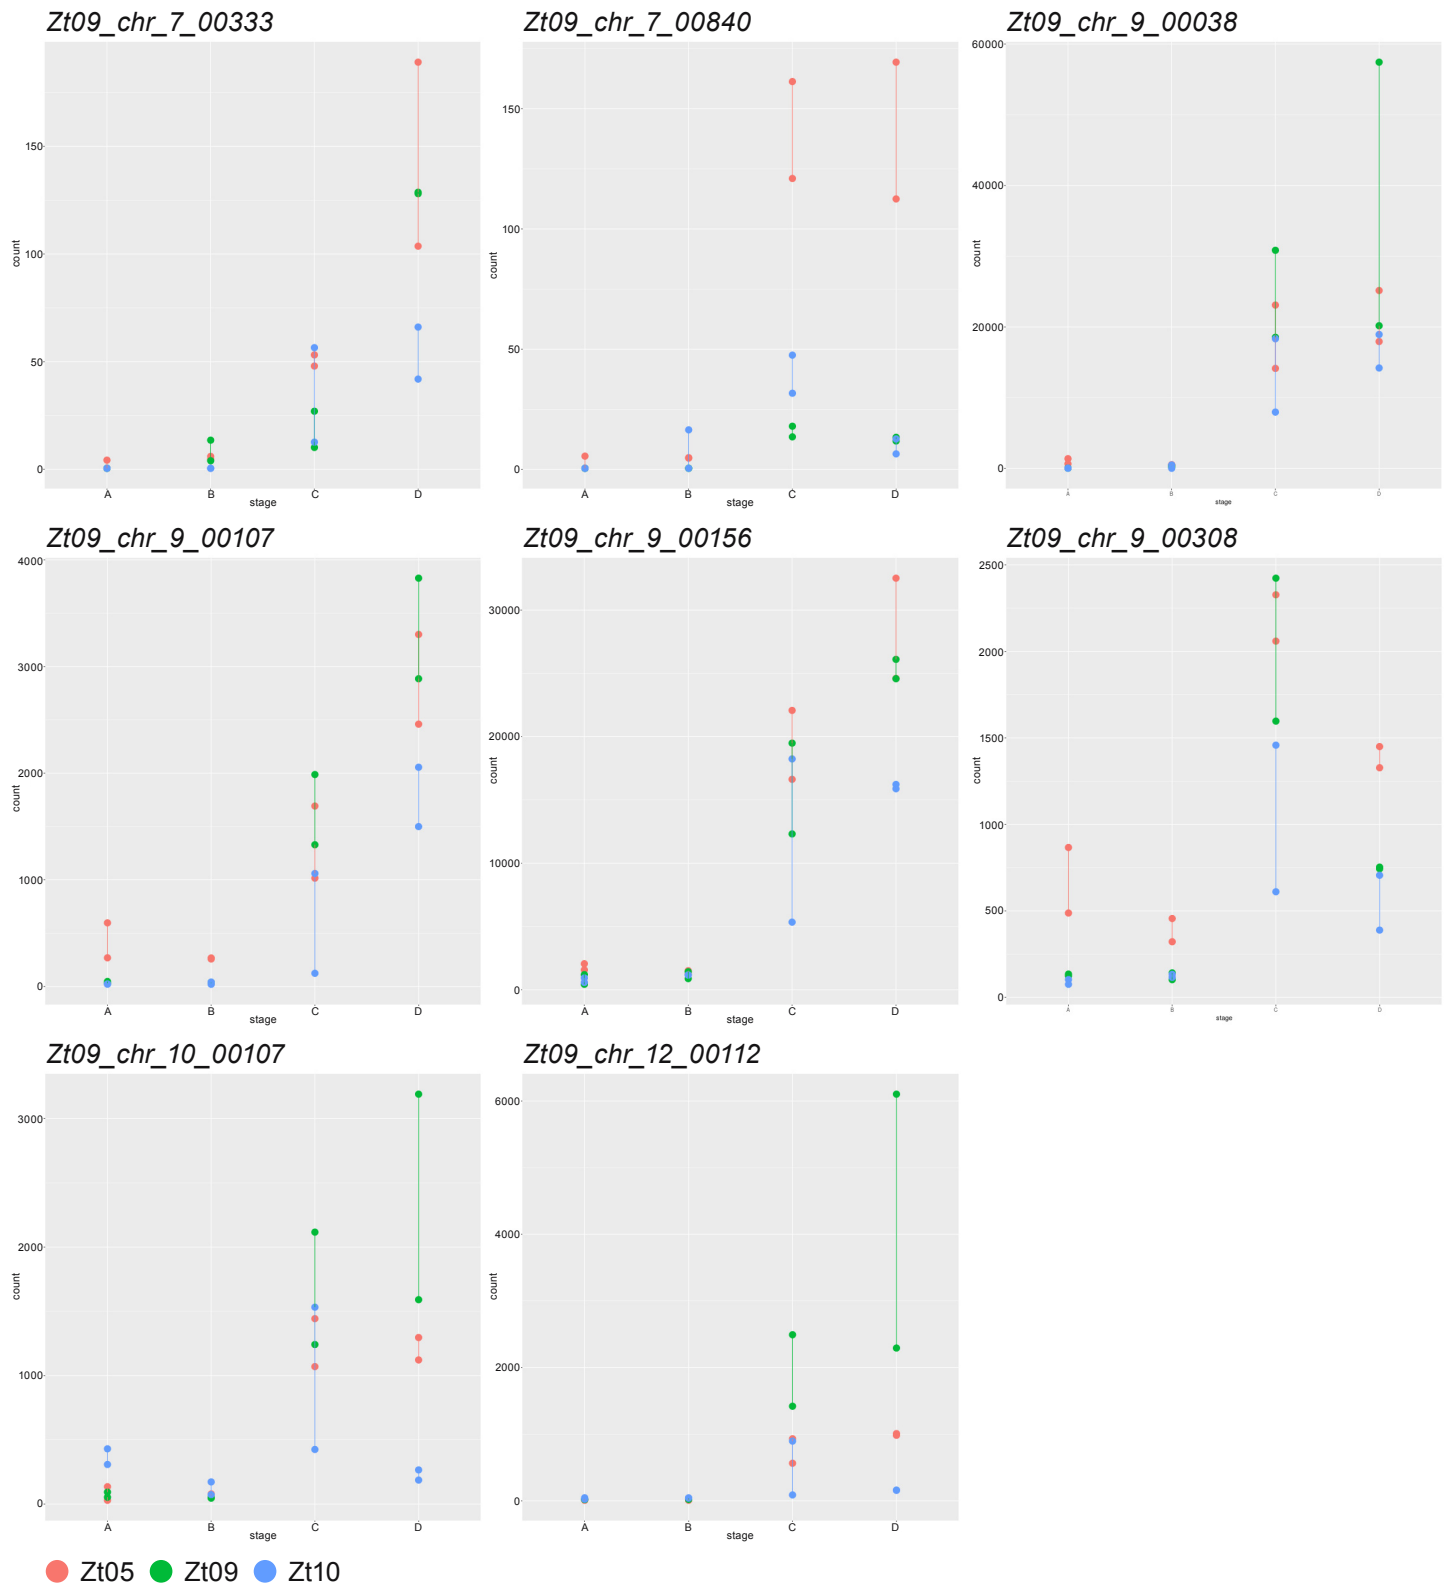

Figure S15

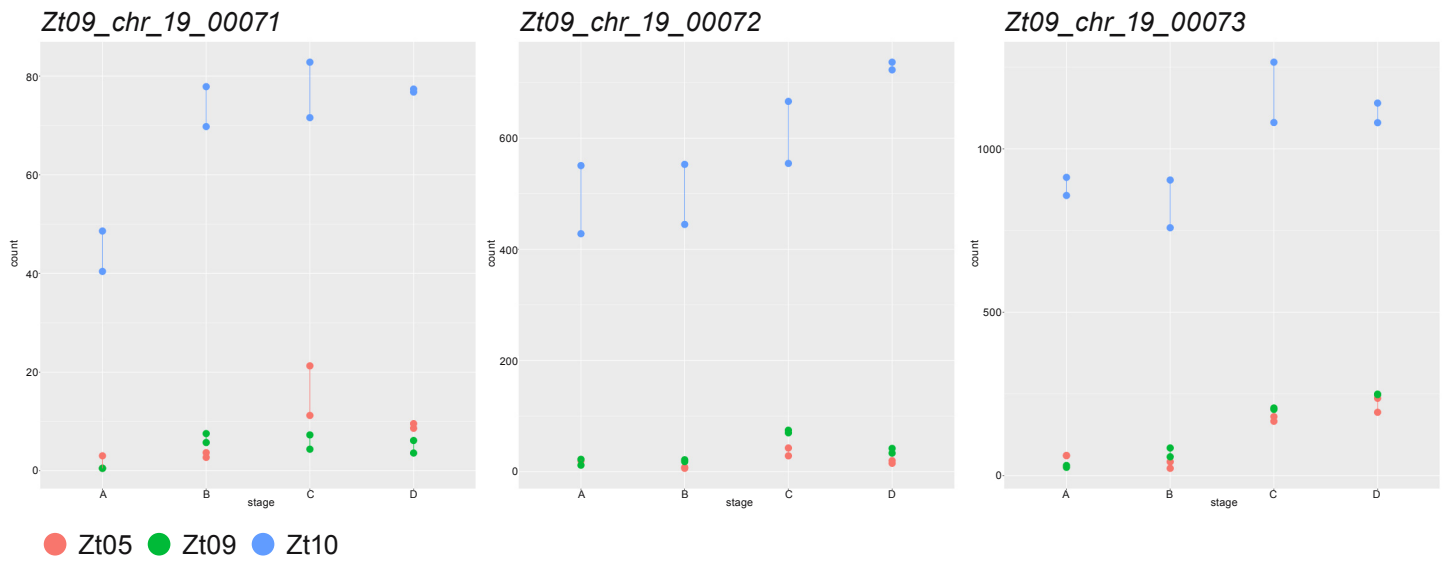

Figure S16

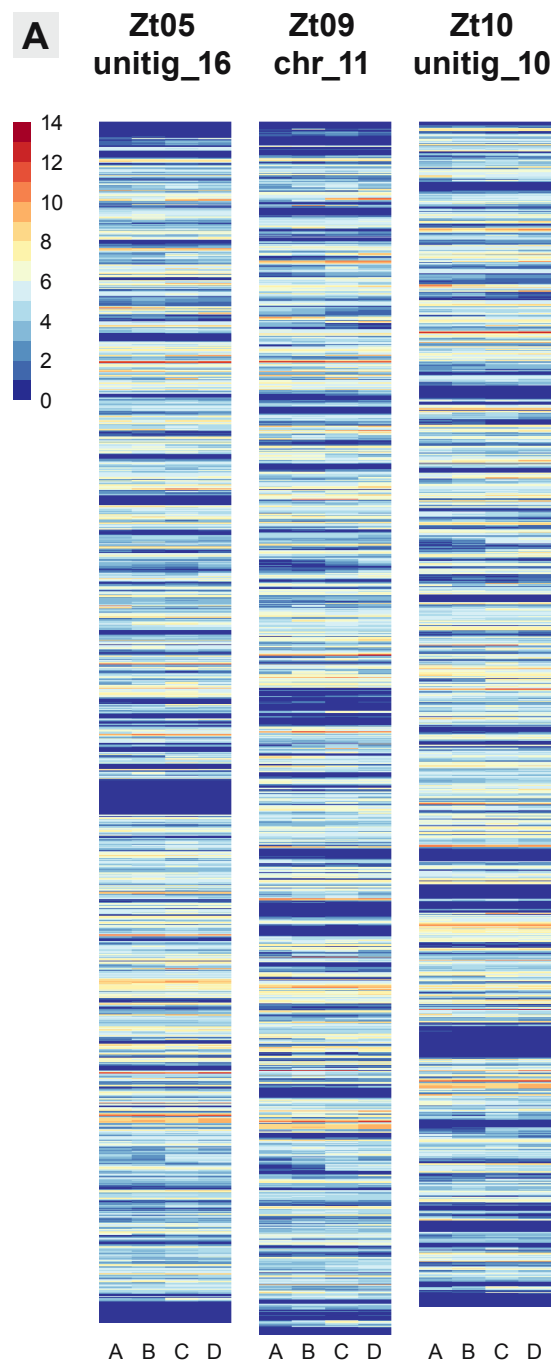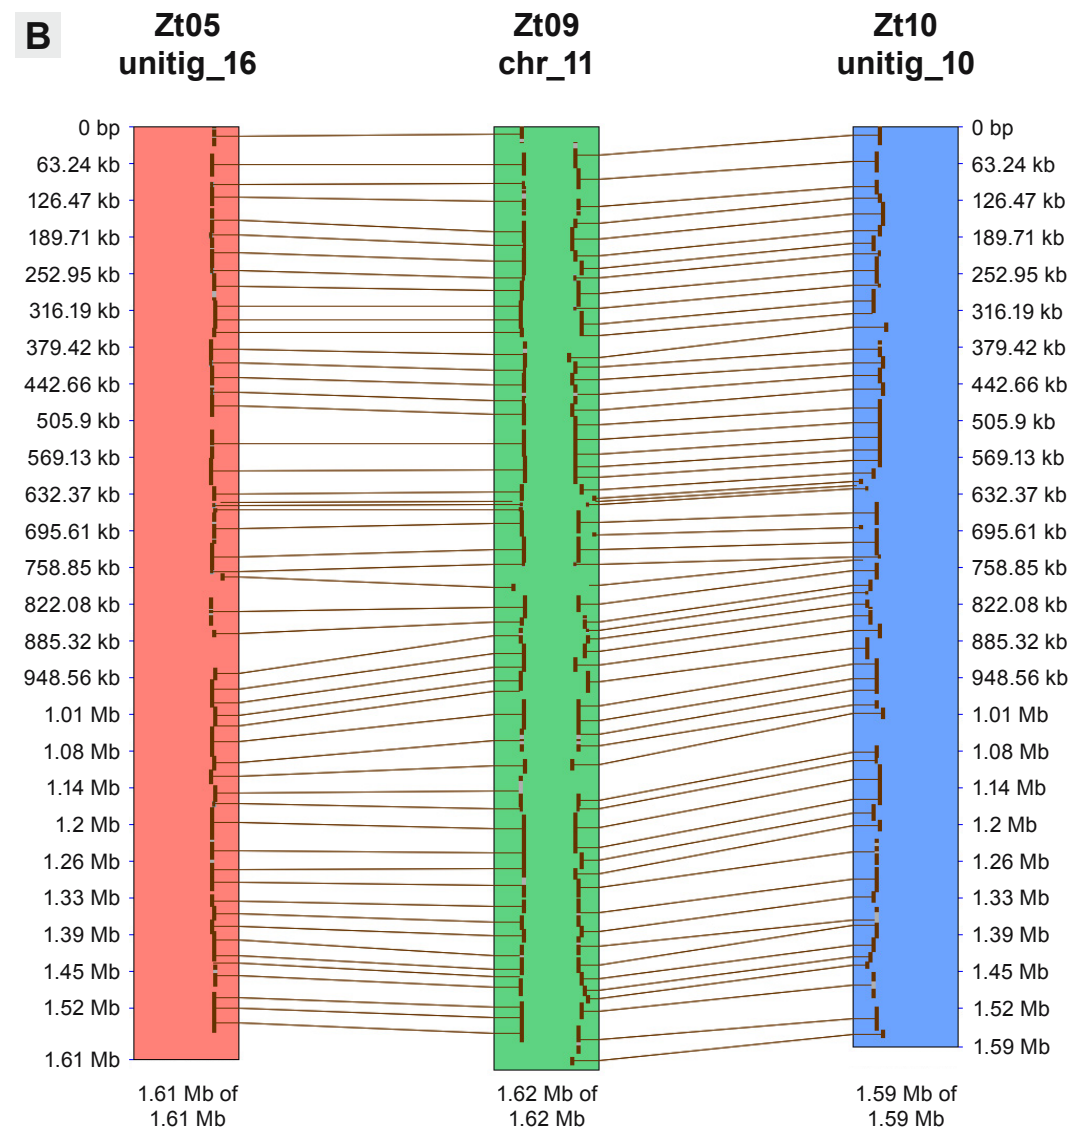

Figure S17

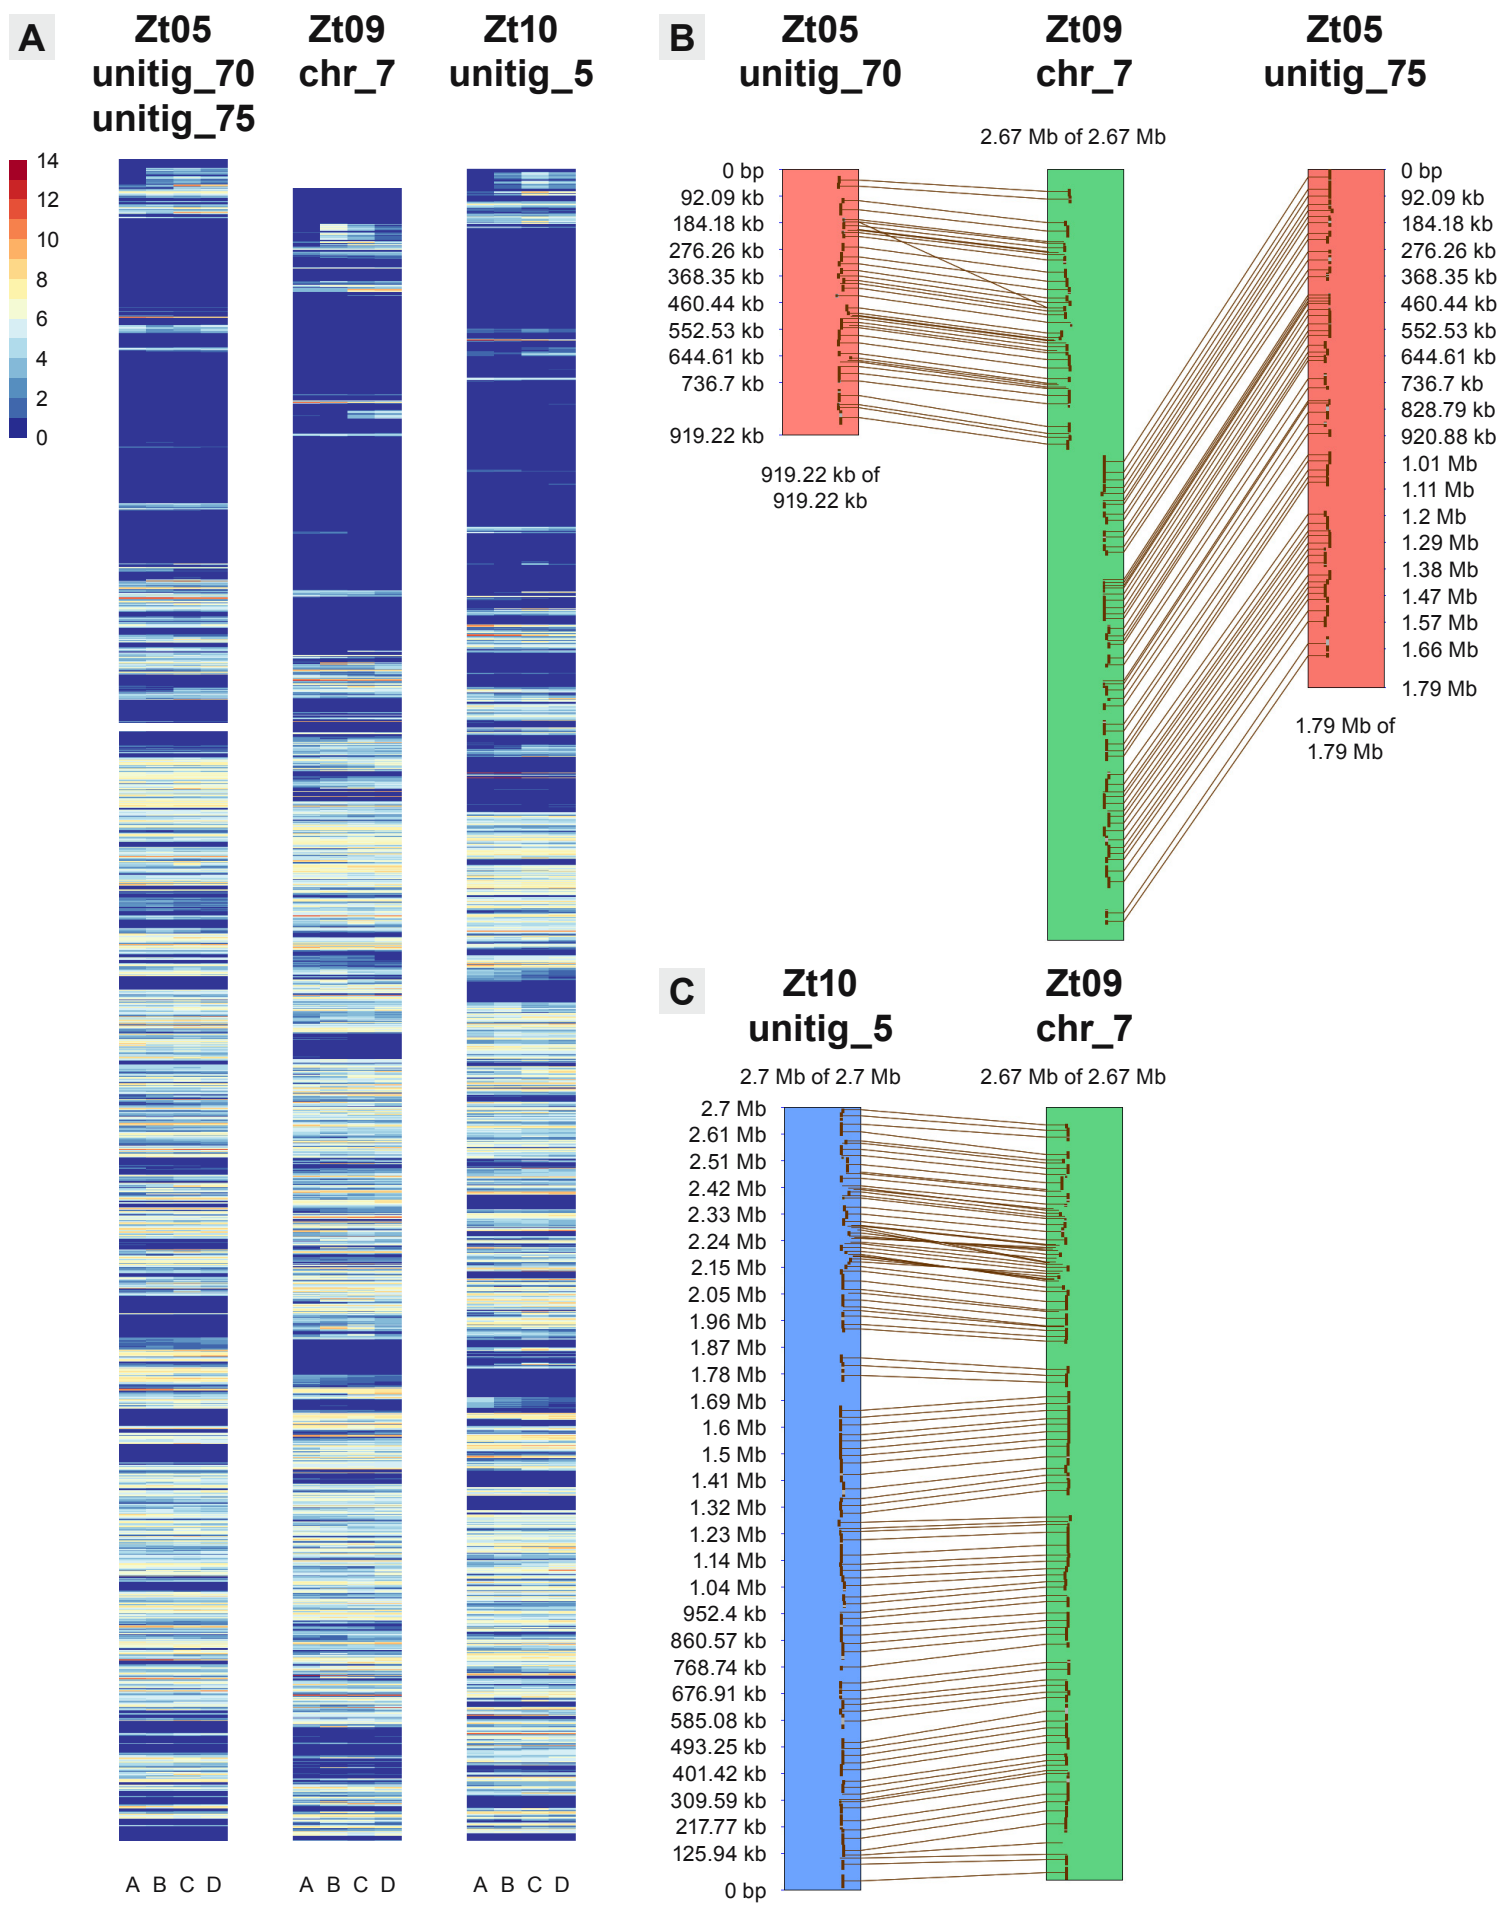

Figure S18

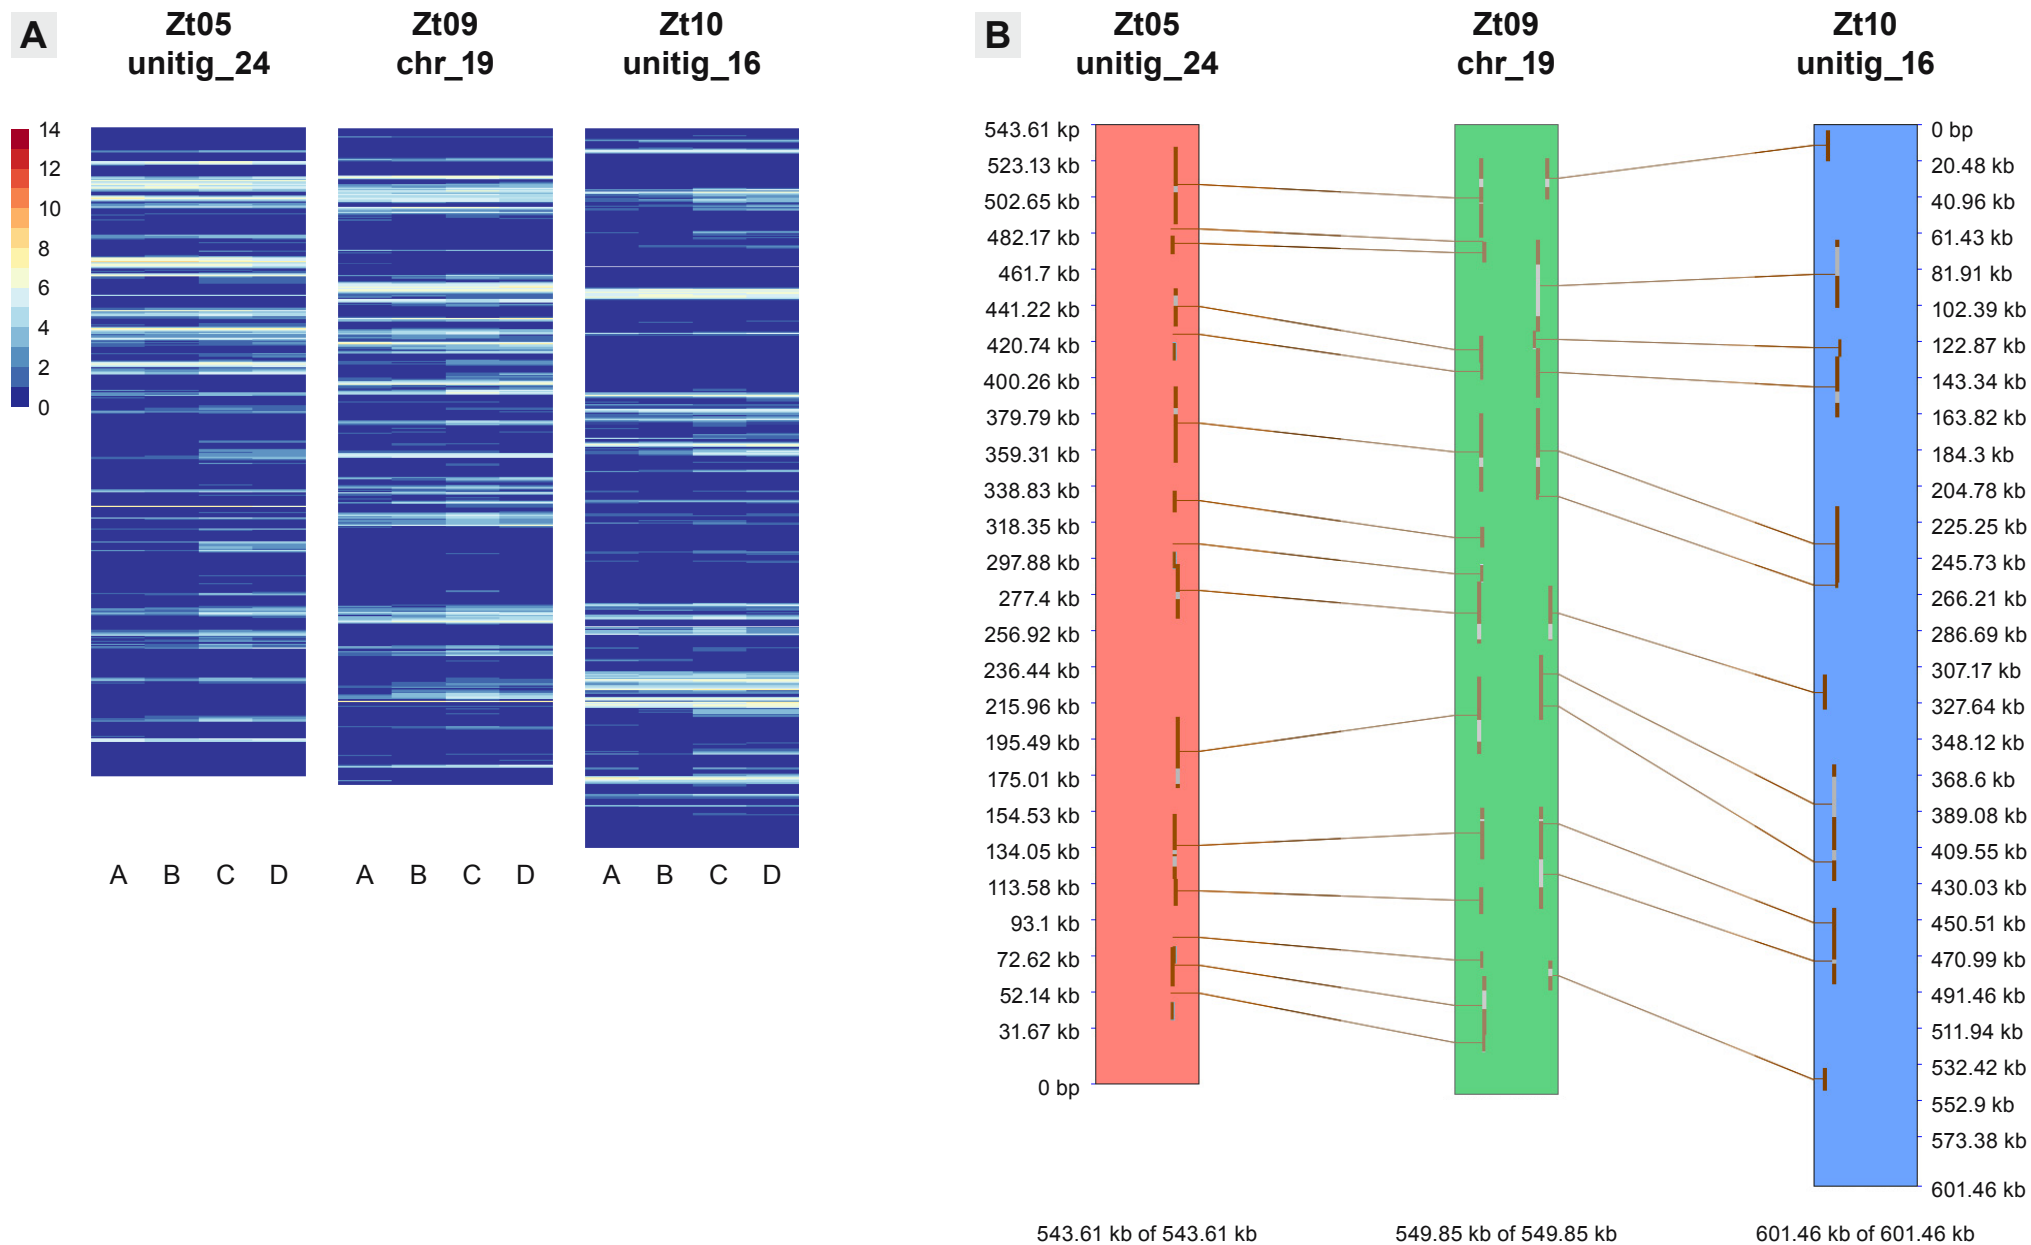

Supplement: ECE3-9-275-s001.pdf [file ECE3-9-275-s001.pdf]
